# Supplementary material for: Benzoyl radicals from (hetero)aromatic aldehydes. Decatungstate photocatalyzed synthesis of substituted aromatic ketones
Source: Royal Society of Chemistry journal article supplement (doi:10.1039/c0ob00066c), 2010-01-01

Supplementary Material (ESI) for OBC

# **Benzoyl Radicals from (Hetero)aromatic Aldehydes. Decatungstate Photocatalyzed Synthesis of Substituted Aromatic Ketones.**

Davide Ravelli,<sup>§</sup> Michele Zema,<sup>†</sup> Mariella Mella,<sup>§</sup> Maurizio Fagnoni, <sup>\*,§</sup> and Angelo Albini<sup>§</sup>

<sup>§</sup>*Department of Organic Chemistry, University of Pavia, Viale Taramelli 10, 27100 Pavia, Italy*

<sup>†</sup>*Department of Earth Sciences, University of Pavia, Via Ferrata 1, 27100 Pavia, Italy.*

fagnoni@unipv.it

**1) Selected absorption spectra of starting aldehydes, TBADT and reaction**

**mixture.**

**S2-S3**

**2) <sup>1</sup>H-NMR and <sup>13</sup>C-NMR spectra of compounds 3-9, 11-15**

**S4-S33**

## 1) Selected absorption spectra of starting aldehydes, TBADT and reaction mixture.

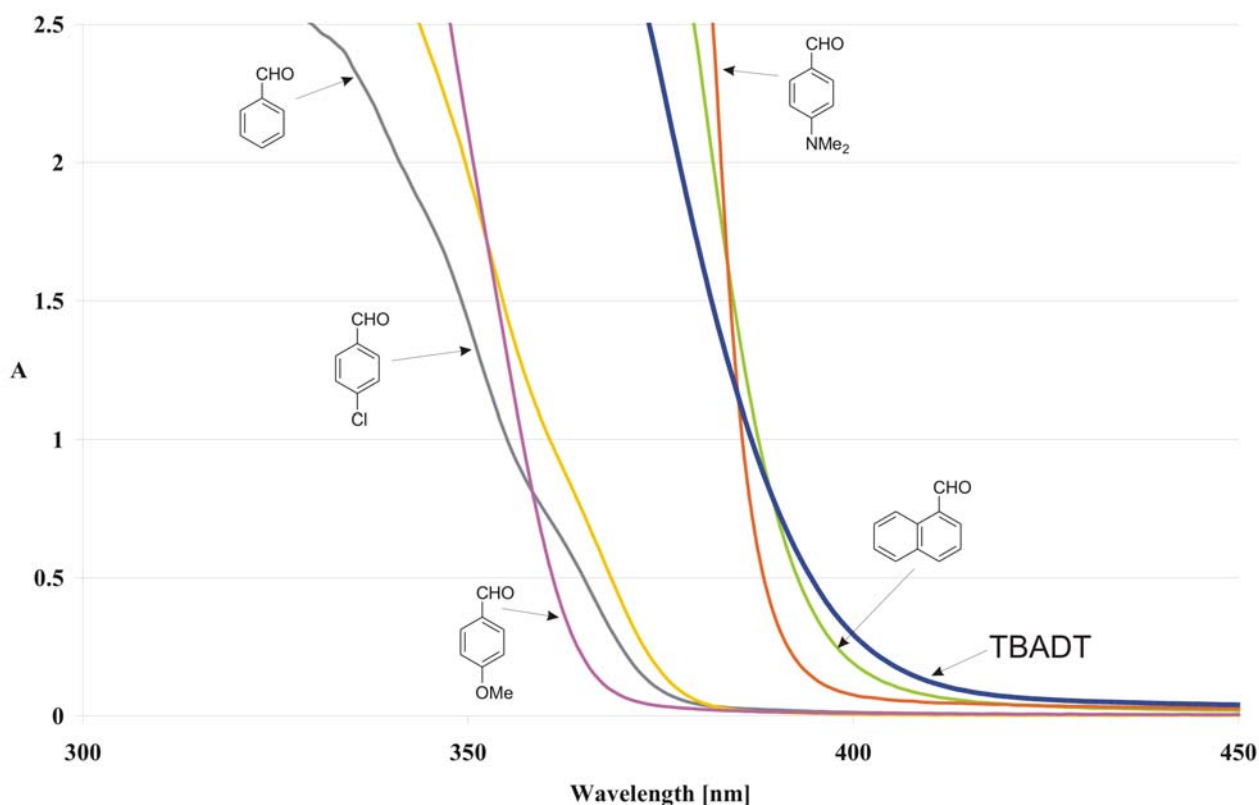

**Figure S1** Absorption spectra of selected aldehydes (0.1 M) and of TBADT (0.002 M, these are the concentration used in preparative experiments).

As it is apparent from Figure S1, when the competitive absorption of the aldehyde is not overwhelming (as for aldehydes **1a-c**) the reaction occurred whereas where the absorption is comparable with TBADT (e.g. for naphthaldehyde and 4-aminobenzaldehyde) no acylation took place.

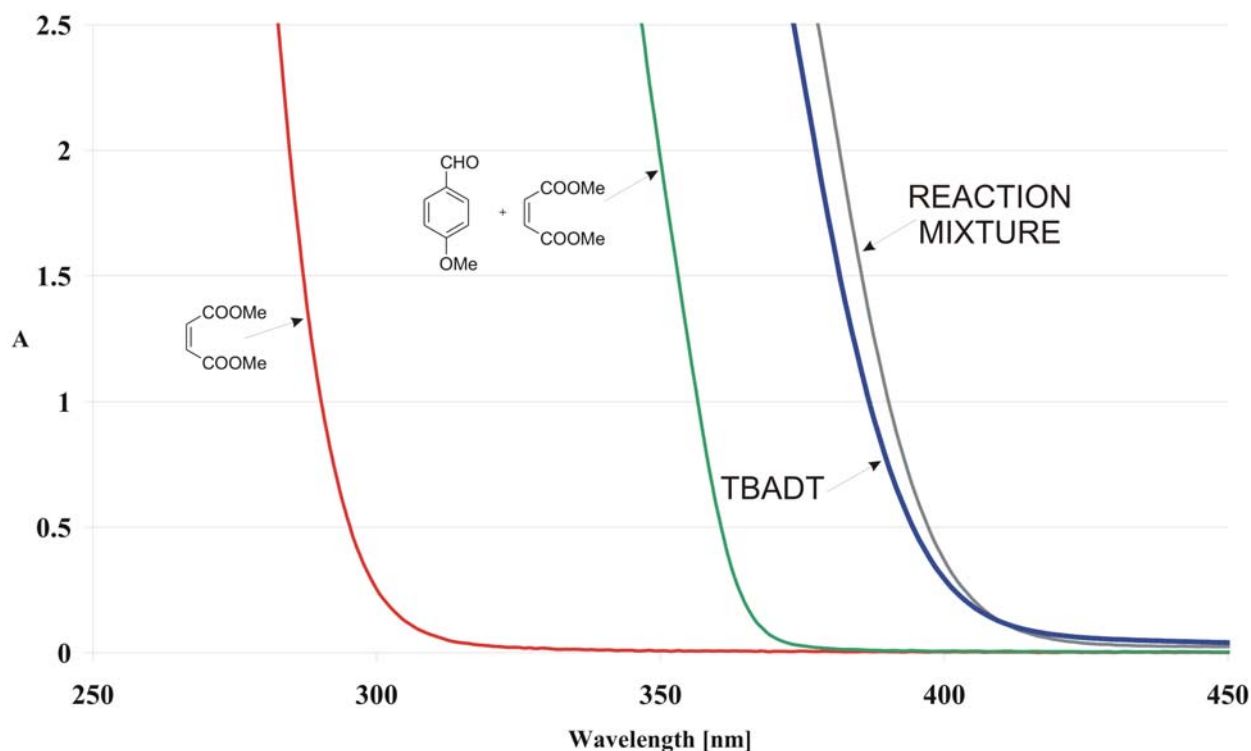

**Figure S2** Selected absorption spectra concerning the TBADT photocatalyzed reaction between dimethyl maleate (**2a**) and anisaldehyde (**1a**) in MeCN.

Figure S2 ruled out both a possible competitive absorption of the olefin (e.g. dimethyl maleate) used as radical traps and the formation of ground state complexes. In fact the absorption spectra of TBADT is virtually superimposable to that of the overall reaction mixture containing aldehyde **1a** and olefin **2a** confirming again that the photocatalyst is by far the main absorbing species in solution.

## 2) $^1\text{H}$ -NMR and $^{13}\text{C}$ -NMR spectra of compounds 3-9, 11-15

### Compound 3.

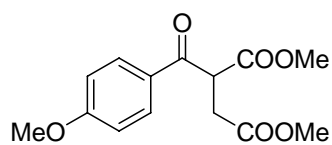

### $^1\text{H}$ -NMR

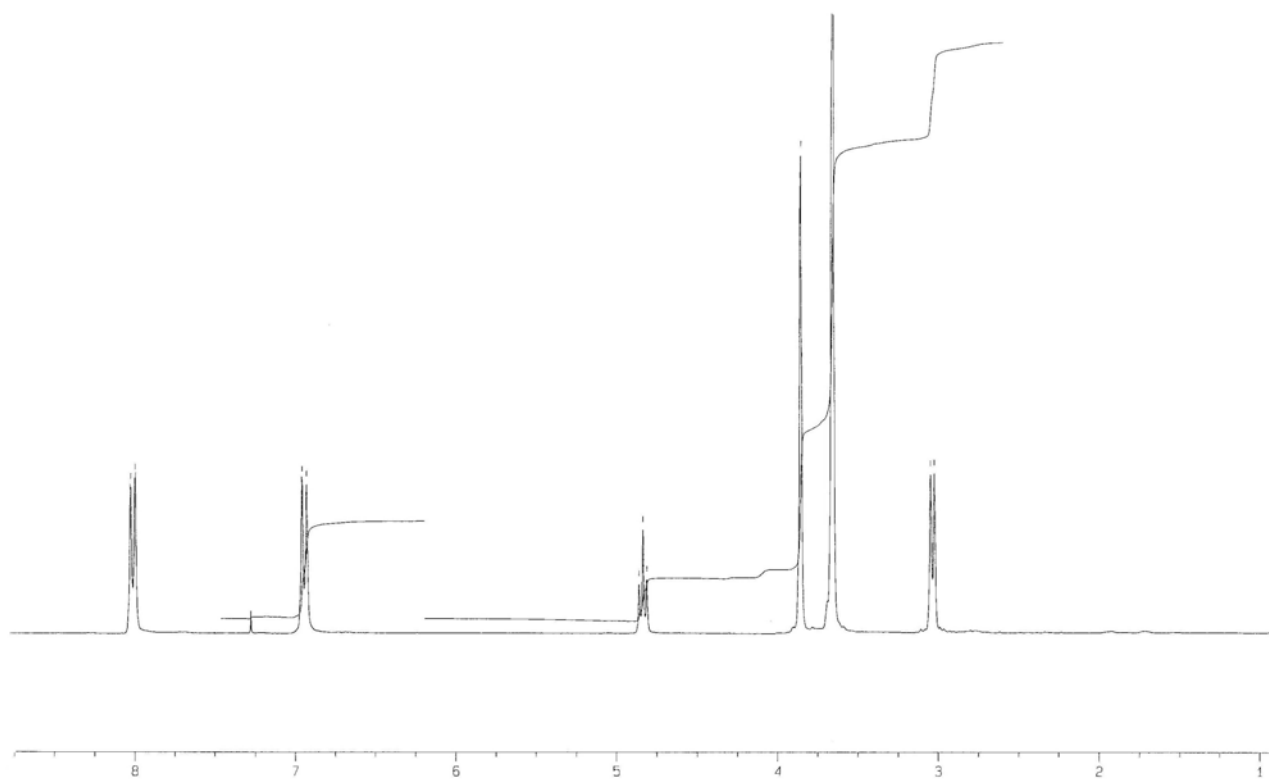

### Compound 3.

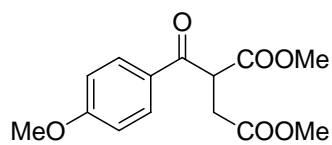

### <sup>13</sup>C-NMR

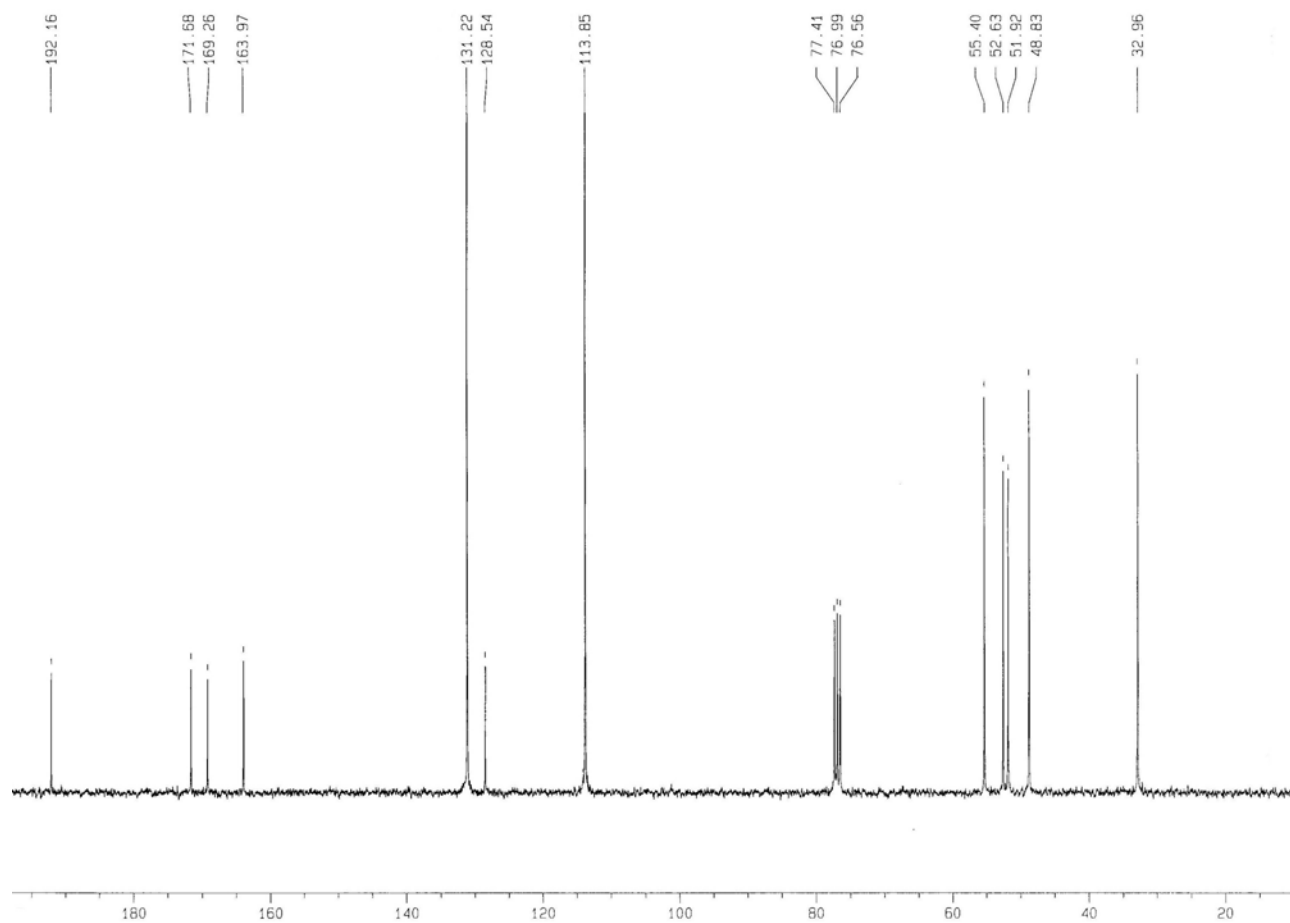

**Compound 4.**

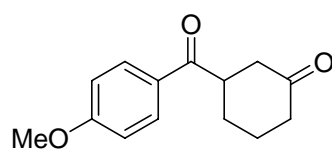

**<sup>1</sup>H-NMR**

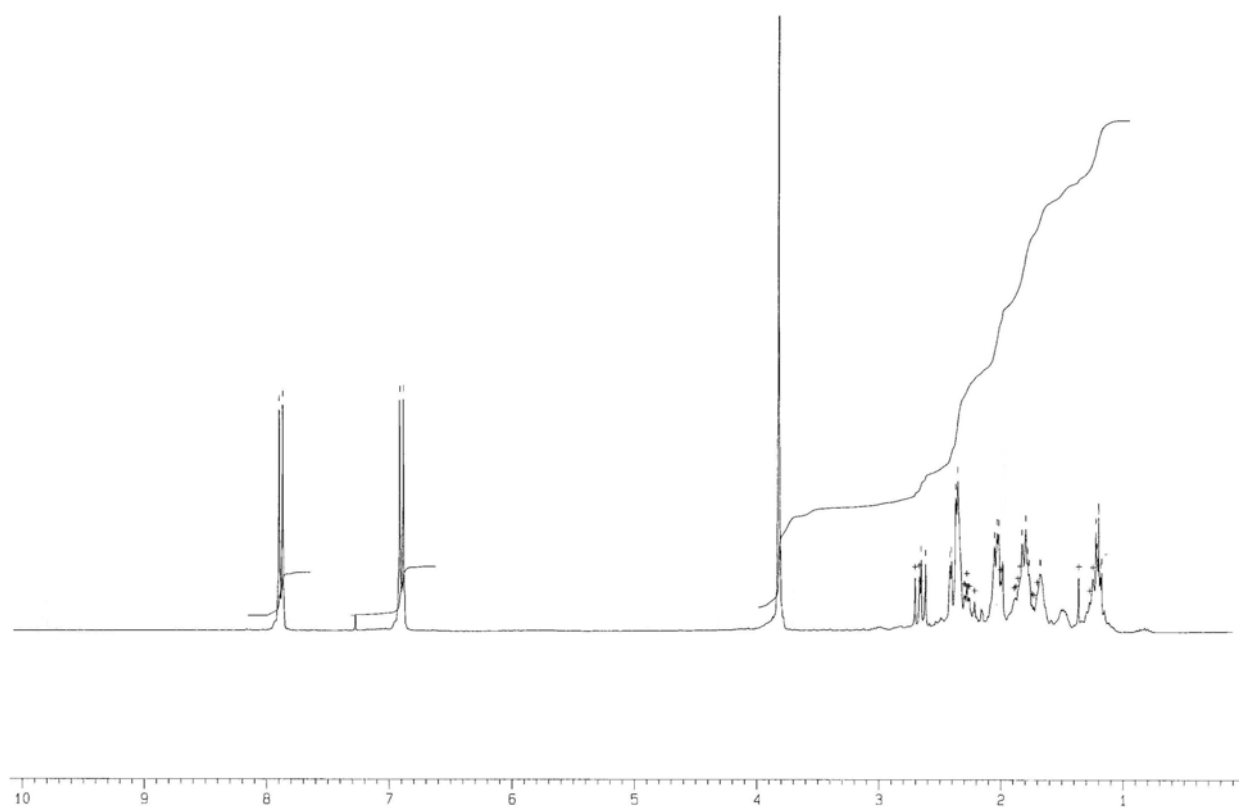

**Compound 4.**

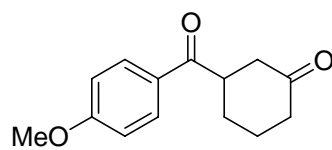

**$^{13}\text{C}$ -NMR**

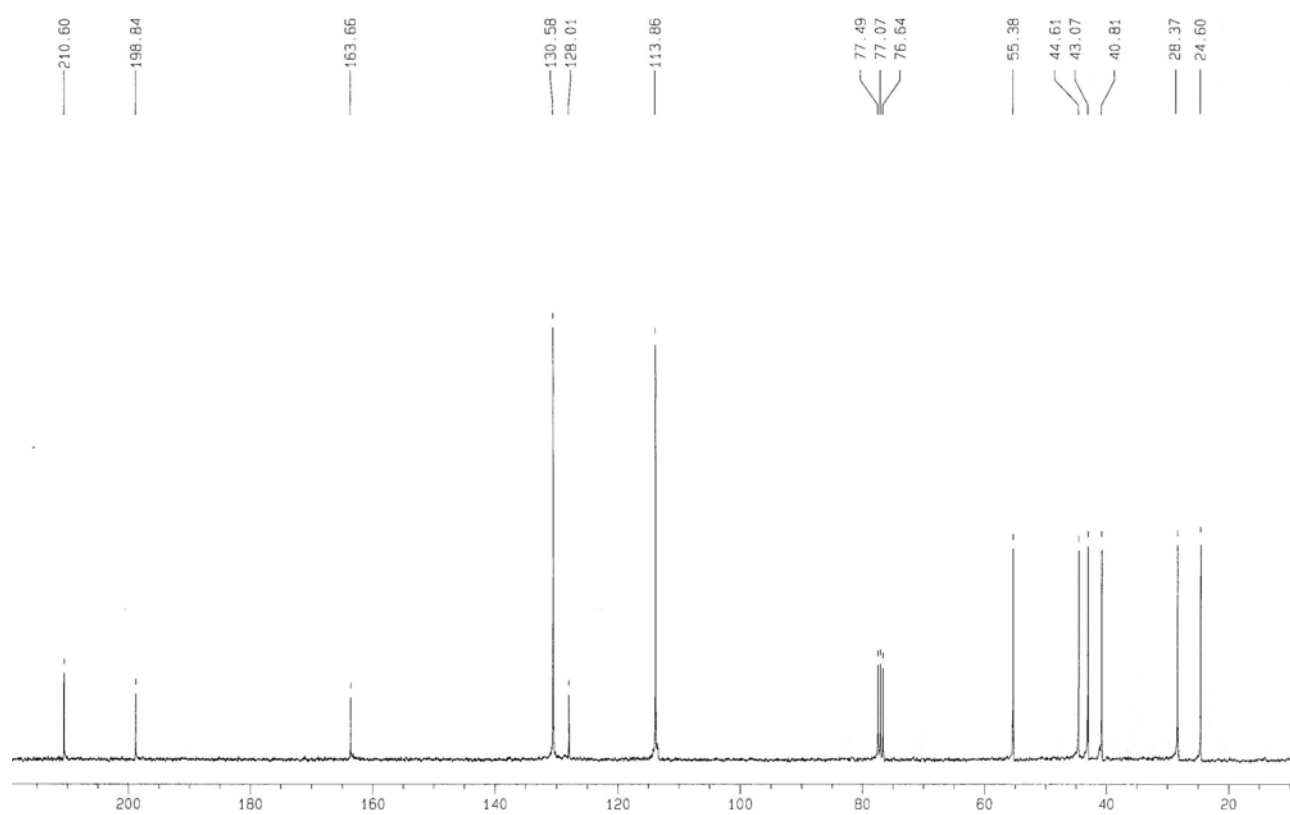

**Compound 5.**

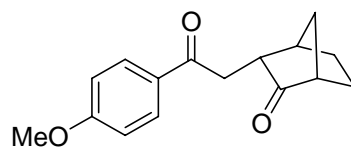

**$^1\text{H-NMR}$  ( $\text{CDCl}_3$ )**

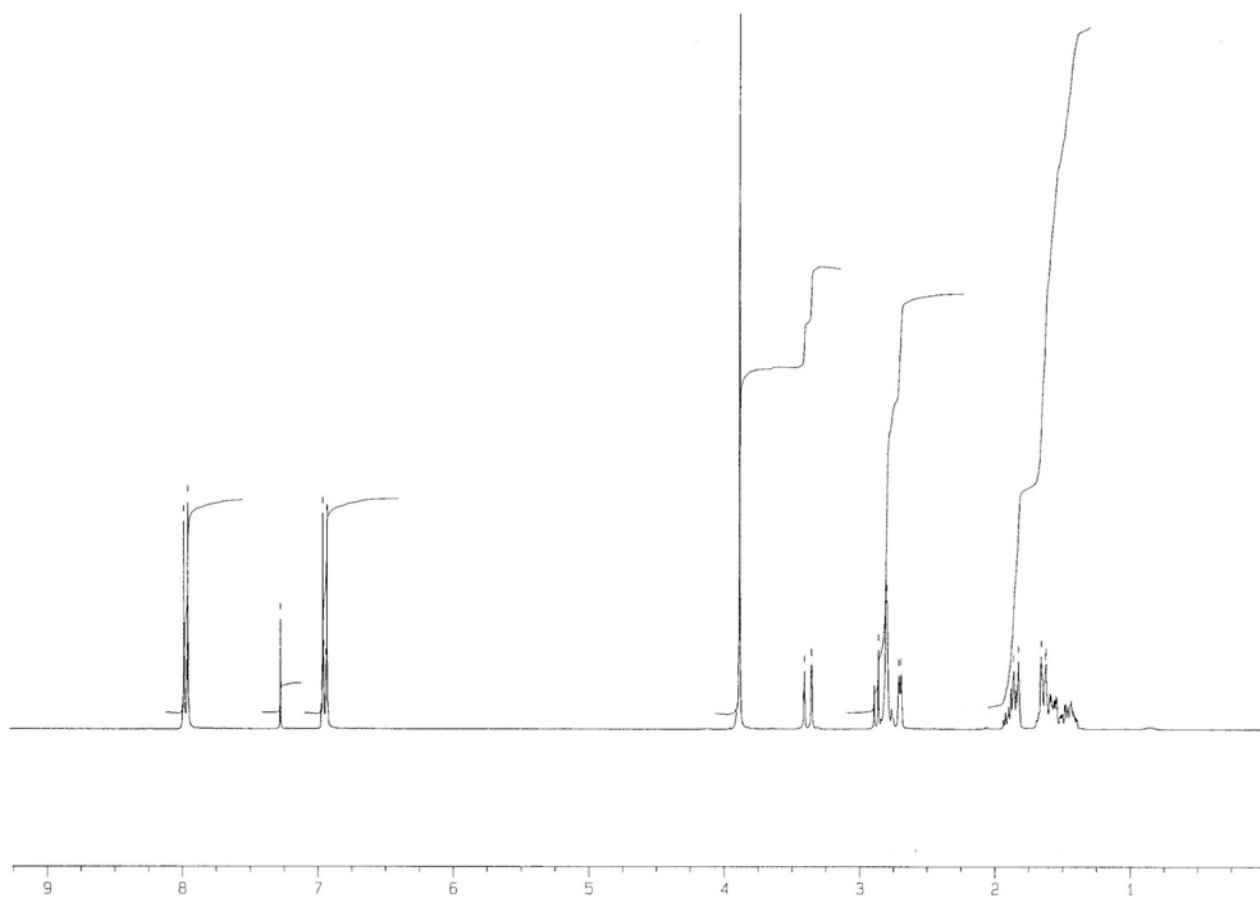



# Compound 5.



## <sup>13</sup>C-NMR

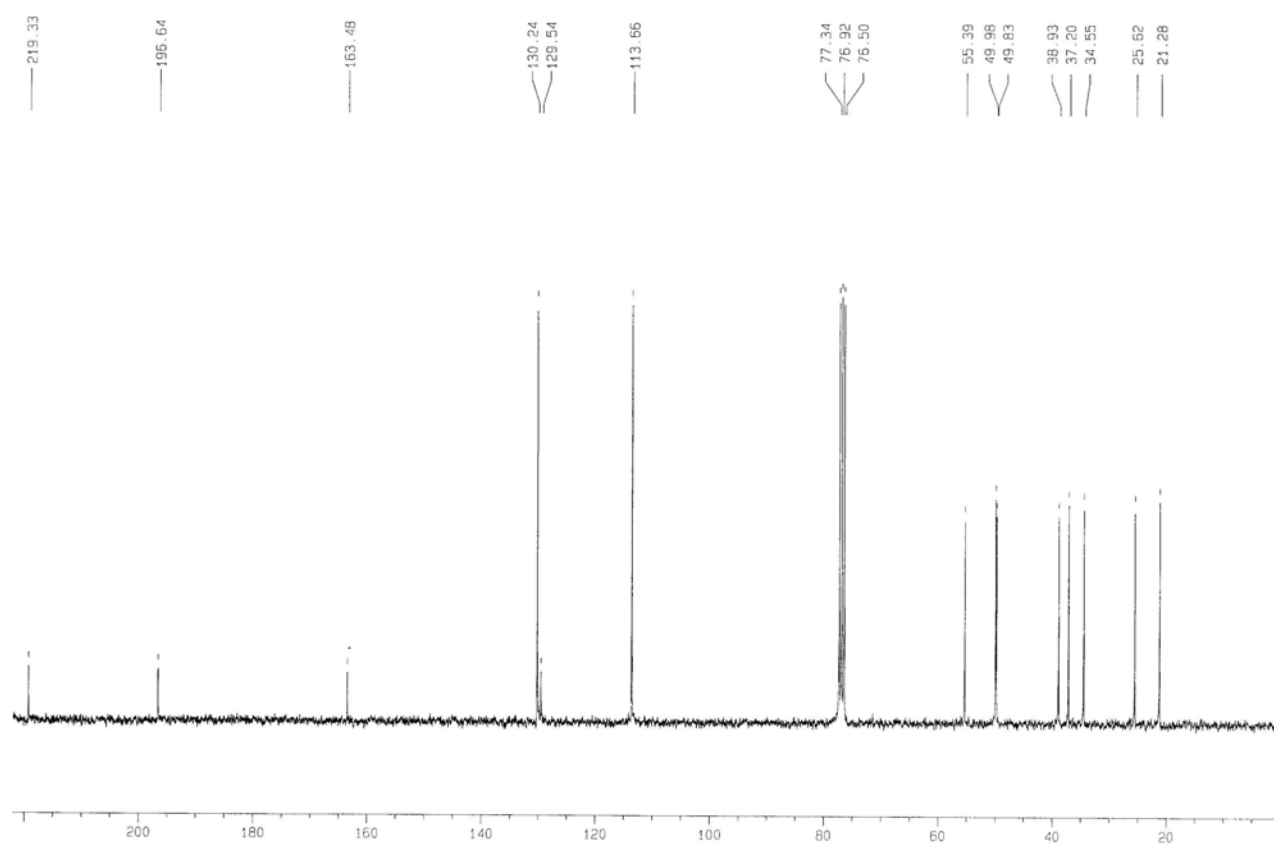

**Compound 5.**



**$^1\text{H-NMR}$  ( $\text{C}_6\text{D}_6$ )**

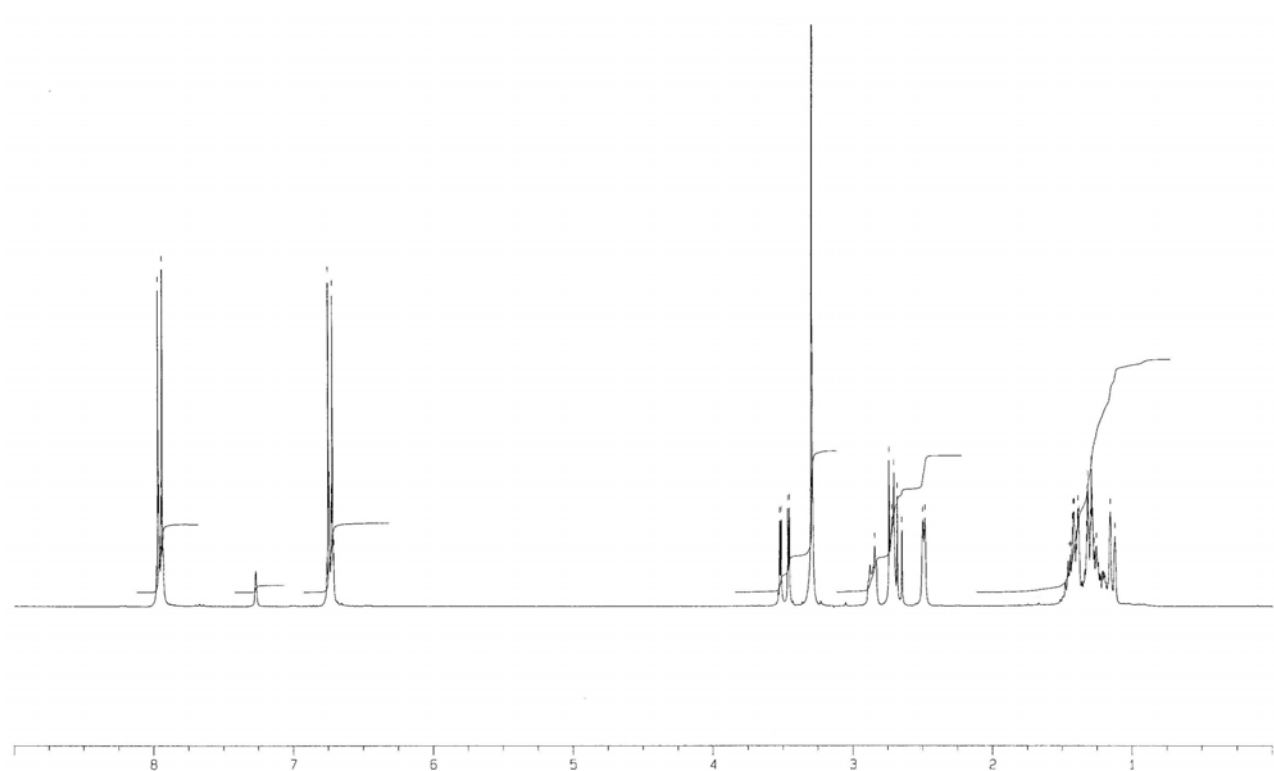

**Compound 5.**



**<sup>1</sup>H-NMR (C<sub>6</sub>D<sub>6</sub>, enlarged portion)**

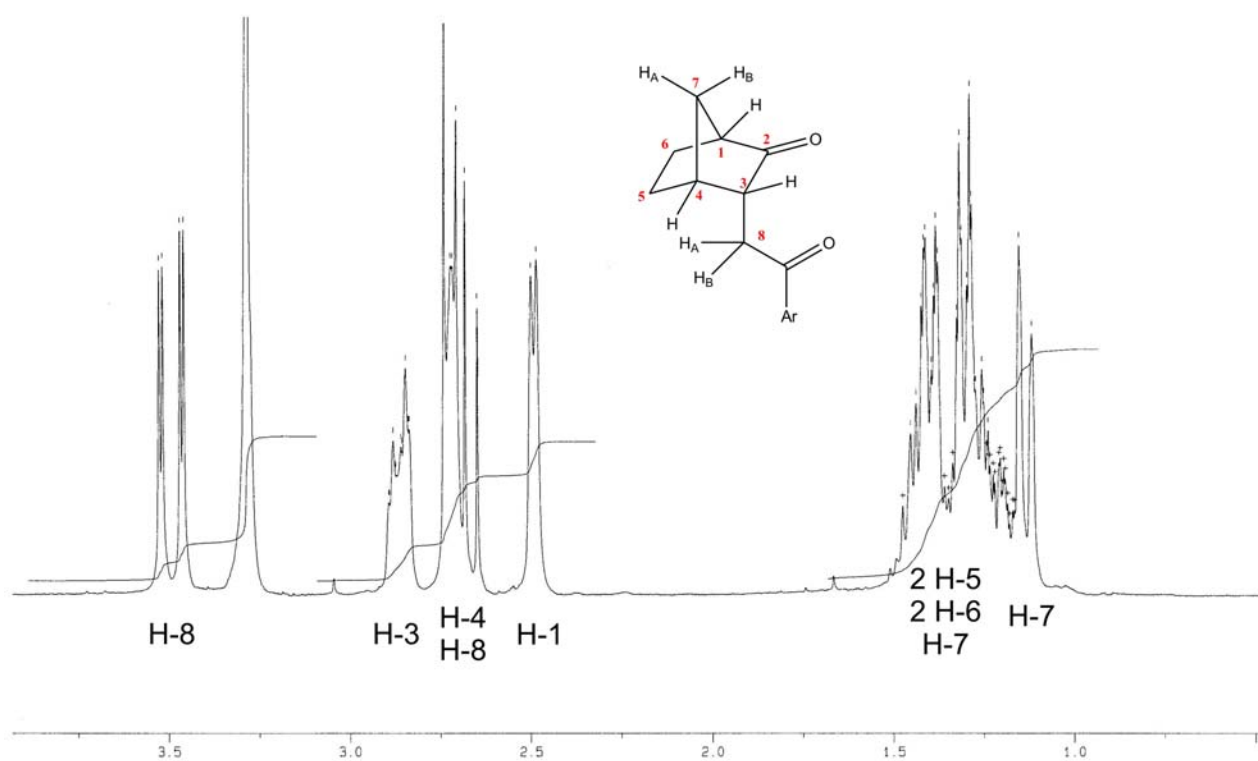

# Compound 5.

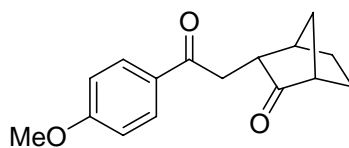

## Long-range COSY

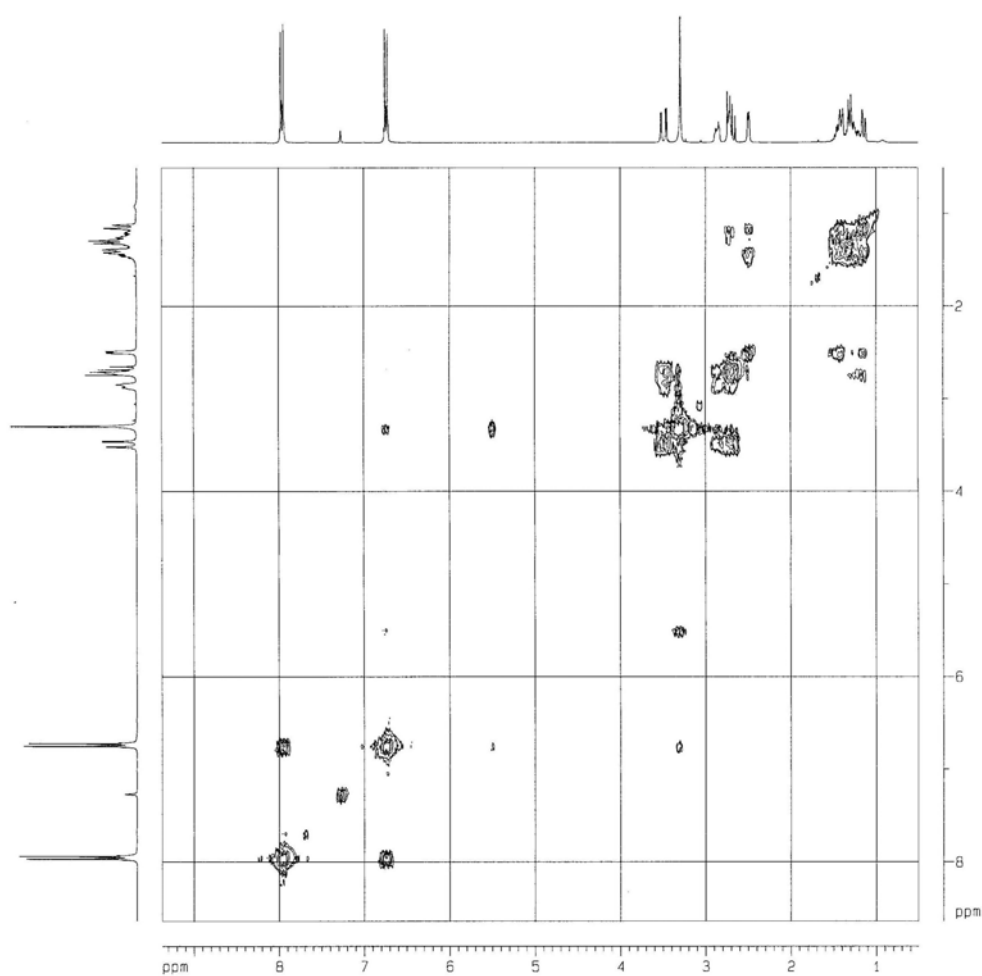

Current Data Parameters  
NAME ccsy\_3p40  
EXPNO 11  
PROCNO 1

F2 - Acquisition Parameters  
Date\_ 20100317  
Time 11:17  
INSTRUM spect  
PROBHD 5 mm Multinuc1  
PULPROG ccsy1nrf  
TD 1024  
SOLVENT CDCl3  
NS 4  
DS 16  
SWH 3305.875 Hz  
FIDRES 3.228373 Hz  
AQ 0.1548788 sec  
RG 362  
SW 151.200 usec  
DE 6.00 usec  
TE 303.2 K  
D0 0.0000000 sec  
D1 2.0000000 sec  
D6 0.1000000 sec  
D9 0.0030240 sec  
HOREST 0.0000000 sec  
MCWIR 2.0000000 sec

\*\*\*\*\* CHANNEL f1 \*\*\*\*\*  
NUC1 1H  
P1 9.70 usec  
PL1 -2.00 dB  
SFO1 300.1316507 MHz

F1 - Acquisition parameters  
NS 1  
TD 128  
SFO1 300.1317 MHz  
FIDRES 25.834988 Hz  
SW 11.018 ppm  
FWD00 0

F2 - Processing parameters  
SI 1024  
SF 300.1300000 MHz  
WDW SINE  
SSB 0  
LB 0.00 Hz  
GB 0  
PC 1.00

F1 - Processing parameters  
SI 256  
WDW 0  
SF 300.1300000 MHz  
WDW SINE  
SSB 0  
LB 0.00 Hz  
GB 0

2D NMR plot parameters  
CX2 15.00 cm  
CX1 15.00 cm  
F2PL0 6.374 ppm  
F2PL1 2813.28 Hz  
F2PH1 0.507 ppm  
F2MH 152.20 Hz  
F1PL0 8.642 ppm  
F1PL1 2593.69 Hz  
F1PH1 0.507 ppm  
F1MH 152.20 Hz  
F2PH2CH 0.59108 ppm/cm  
F2MH2CH 177.40024 Hz/cm  
F1PH2CH 0.54230 ppm/cm  
F1MH2CH 162.76042 Hz/cm

# Compound 5.



## Long-range COSY (enlarged portion)

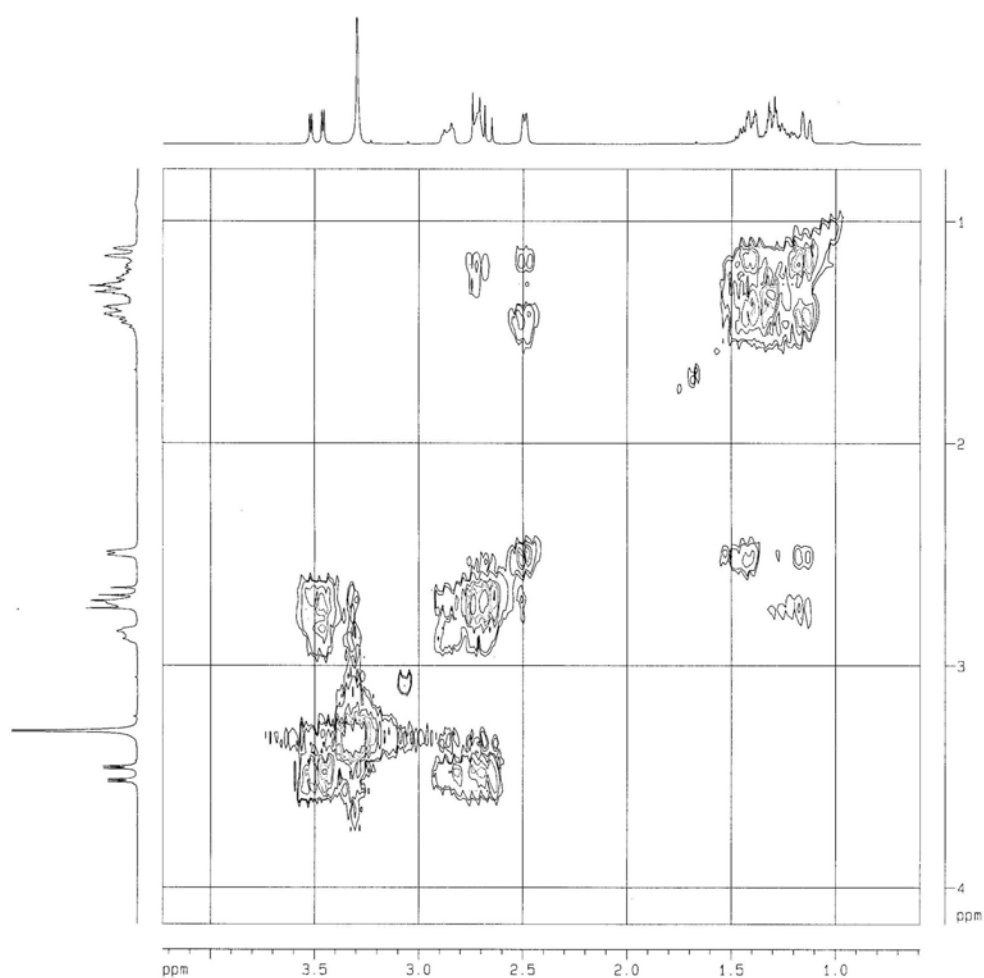

Current Data Parameters  
NAME cosy\_grad  
EXPNO 11  
PROCNO 1

F2 - Acquisition Parameters  
Date\_ 20100317  
Time 11.17  
INSTRUM spect  
PROBHD 5 mm Multinuc1  
PULPROG cosy1  
TD 1024  
SOLVENT DMSO  
NS 4  
DS 16  
SWH 3306.878 Hz  
FIDRES 3.29373 Hz  
AQ 0.1548788 sec  
RG 362  
DM 151.200 usec  
DE 6.00 usec  
TE 303.2 K  
D0 0.0000300 sec  
D1 2.0000000 sec  
D6 0.1000000 sec  
IND 0.00030240 sec  
MCREST 0.0000000 sec  
MCWIR 2.0000000 sec

\*\*\*\*\* CHANNEL f1 \*\*\*\*\*  
NUC1 1H  
P1 9.70 usec  
PL1 -2.00 dB  
SF01 300.1316507 MHz

F1 - Acquisition parameters  
NO 1  
TD 128  
SF01 300.1317 MHz  
FIDRES 25.834988 Hz  
SW 11.018 ppm  
F0MODE Q

F2 - Processing parameters  
SI 1024  
SF 300.1300000 MHz  
WDW SINE  
SSB 0  
LB 0.00 Hz  
GB 0  
PC 1.00

F1 - Processing parameters  
SI 256  
WDW SINE  
SSB 0  
LB 0.00 Hz  
GB 0

2D NMR plot parameters  
CX2 15.00 cm  
CX1 15.00 cm  
F2PL0 4.230 ppm  
F2L0 1289.65 Hz  
F2PHI 0.593 ppm  
F2H1 178.12 Hz  
F2PL1 4.166 ppm  
F2L1 1250.27 Hz  
F2PH1 0.766 ppm  
F2H1 229.79 Hz  
F2PHMCH 0.24245 ppm/cm  
F2H2MCH 72.76855 Hz/cm  
F2PHMCH 0.20658 ppm/cm  
F2H2MCH 68.03213 Hz/cm

# Compound 5.

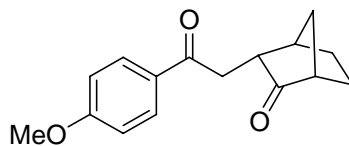

## NOESY

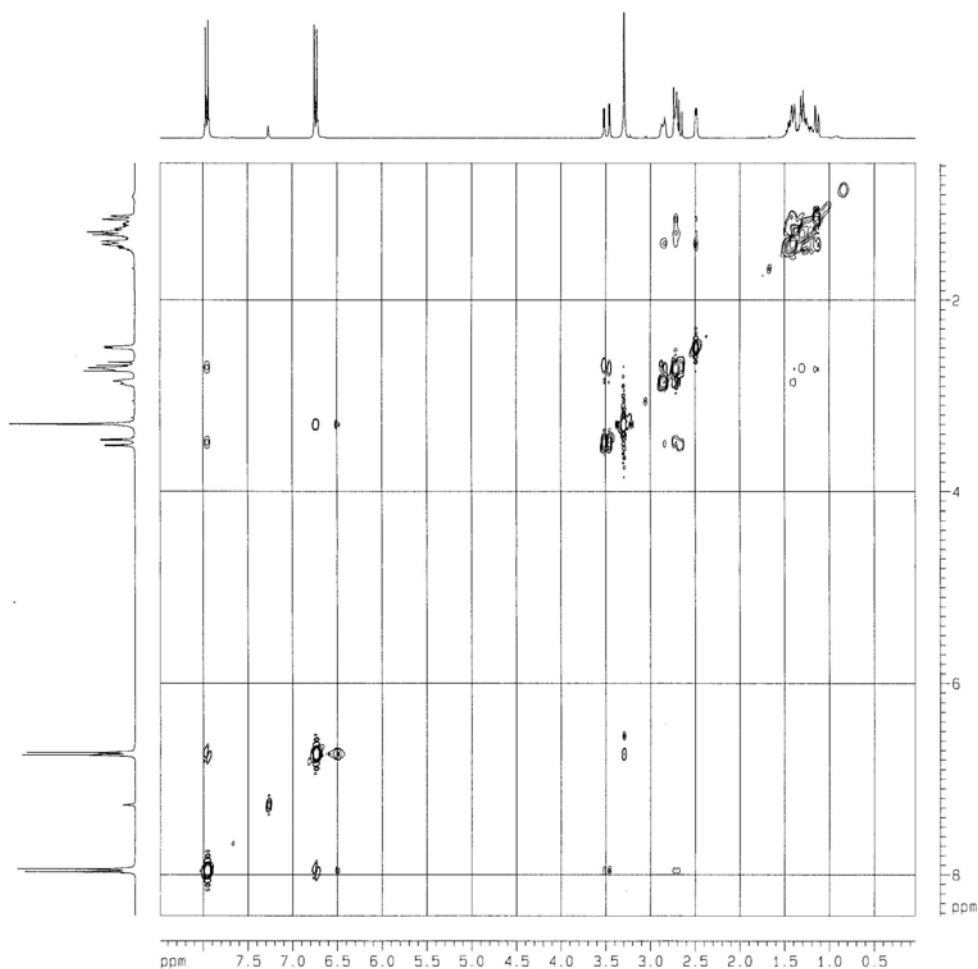

Current Data Parameters  
NAME noesy  
EXPNO 2  
PROCNO 1

F2 - Acquisition Parameters  
Date\_ 20100304  
Time 18.07  
INSTRUM spect  
PROBHD 5 mm Multinuc1  
PULPROG noesyph  
TD 1024  
SOLVENT CDCl3  
NS 32  
DS 16  
SWH 3056.250 MHz  
FIDRES 3.814687 Hz  
AQ 0.1311220 sec  
RG 256  
CW 128.000 usec  
DE 8.00 usec  
TE 298.2 K  
D0 0.0011542 sec  
D1 3.00000000 sec  
D2 1.00000000 sec  
D3 0.0002630 sec  
INRG 0.00000000 sec  
MCORR 3.00000000 sec

\*\*\*\*\* CHANNEL f1 \*\*\*\*\*  
NUC1 1H  
P1 10.00 usec  
PL1 -2.00 dB  
SFO1 300.1319508 MHz

F1 - Acquisition parameters  
ND0 1  
TD 256  
SFO1 300.132 MHz  
FIDRES 15.240000 Hz  
SW 13.000 gpm  
FNUC1 1H

F2 - Processing parameters  
SI 1024  
SF 300.130000 MHz  
WDW SINC  
SSB 2  
LB 0.00 Hz  
GB 0  
PC 1.00

F1 - Processing parameters  
SI 1024  
MC2 1H  
SF 300.130000 MHz  
WDW SINC  
SSB 2  
LB 0.00 Hz  
GB 0

2D NMR plot parameters  
CX2 15.00 cm  
CX1 15.00 cm  
F2PL0 8.483 gpm  
F2L0 2545.84 Hz  
F2PH1 0.643 gpm  
F2H1 12.58 Hz  
F1PL0 8.430 gpm  
F1L0 2530.00 Hz  
F1PH1 0.571 gpm  
F1H1 171.47 Hz  
F2PRCH 0.56264 gpm/cm  
F2HZCH 156.80364 Hz/cm  
F1PRCH 0.52389 gpm/cm  
F1HZCH 157.23558 Hz/cm

# Compound 5.



## NOESY (enlarged portion)

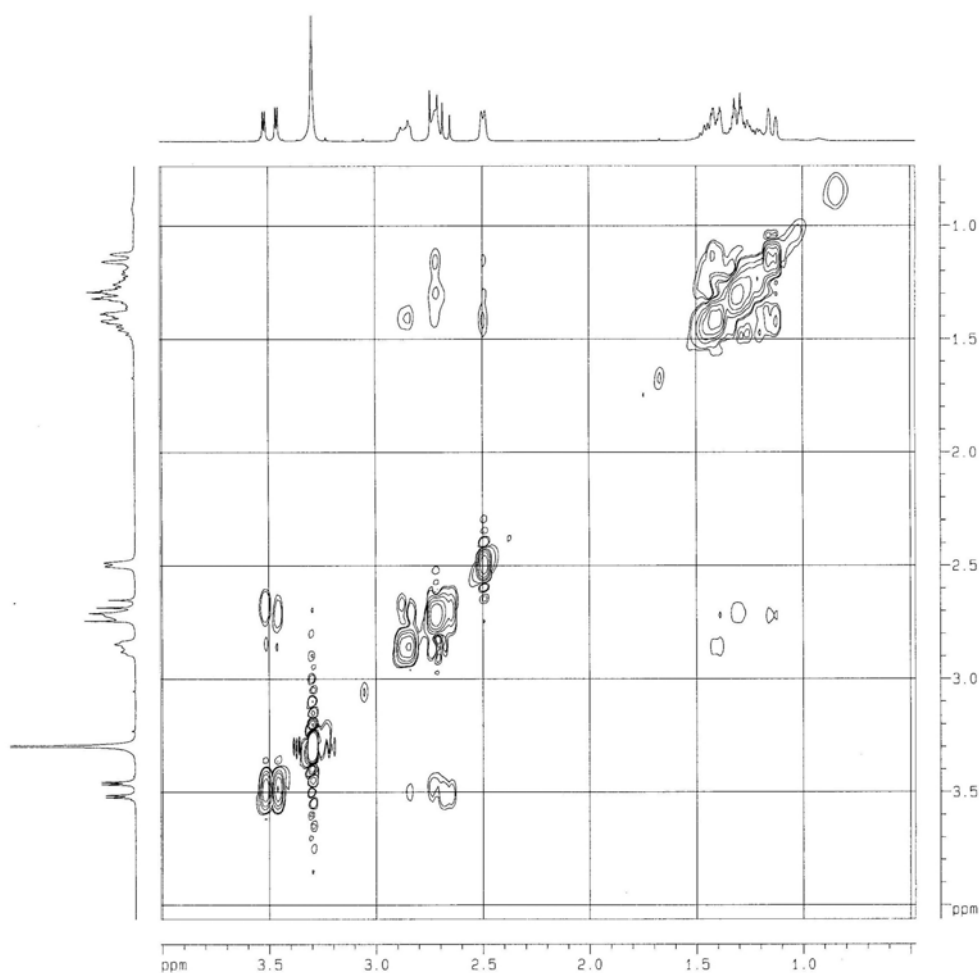

Current Data Parameters

|        |       |
|--------|-------|
| NAME   | file5 |
| EXPNO  | 2     |
| PROCNO | 1     |

F2 - Acquisition Parameters

|         |                 |
|---------|-----------------|
| Date_   | 20100304        |
| Time    | 18.07           |
| INSTRUM | spec1           |
| PROBHD  | 5 mm Multispec1 |
| PULPROG | noesyph         |
| TD      | 1024            |
| SOLVENT | CDCl3           |
| NS      | 32              |
| DS      | 16              |
| SWH     | 3906.250 Hz     |
| FIDRES  | 3.814697 Hz     |
| AQ      | 0.131220 sec    |
| RG      | 256             |
| DM      | 128.000 usec    |
| DE      | 6.00 usec       |
| TE      | 298.2 K         |
| OS      | 0.0001542 sec   |
| D1      | 3.0000000 sec   |
| DB      | 1.0000000 sec   |
| TD0     | 0.00029630 sec  |
| MCOREST | 0.0000000 sec   |
| MCWR    | 3.0000000 sec   |

\*\*\*\*\* CHANNEL f1 \*\*\*\*\*

|      |                 |
|------|-----------------|
| NUC1 | 1H              |
| P1   | 10.00 usec      |
| PL1  | -2.00 dB        |
| SFO1 | 300.1319508 MHz |

F1 - Acquisition parameters

|        |              |
|--------|--------------|
| NOO    | 1            |
| TD     | 256          |
| SFO1   | 300.132 MHz  |
| FIDRES | 15.240000 Hz |
| SW     | 13.000 ppm   |
| FRMDE  | IPP1         |

F2 - Processing parameters

|      |                |
|------|----------------|
| SI   | 1024           |
| SF   | 300.130000 MHz |
| WIDW | 53Hz           |
| SSB  | 2              |
| LB   | 0.00 Hz        |
| GB   | 0              |
| PC   | 1.00           |

F1 - Processing parameters

|      |                |
|------|----------------|
| SI   | 1024           |
| MC2  | IPP1           |
| SF   | 300.130000 MHz |
| WIDW | 53Hz           |
| SSB  | 2              |
| LB   | 0.00 Hz        |
| GB   | 0              |

2D NMR plot parameters

|        |                |
|--------|----------------|
| CH2    | 15.00 cm       |
| CH1    | 15.00 cm       |
| F2PL0  | 4.009 ppm      |
| F2L0   | 1203.17 Hz     |
| F2PH1  | 0.4075 ppm     |
| F2H1   | 142.68 Hz      |
| F1PL0  | 4.063 ppm      |
| F1L0   | 1219.28 Hz     |
| F1PH1  | 0.730 ppm      |
| F1H1   | 221.00 Hz      |
| F2PACH | 0.2256 ppm/cm  |
| F2H2CM | 30.60000 Hz/cm |
| F1PACH | 0.22174 ppm/cm |
| F1H2CM | 60.55206 Hz/cm |

**Compound 6.**

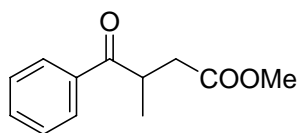

**<sup>1</sup>H-NMR**

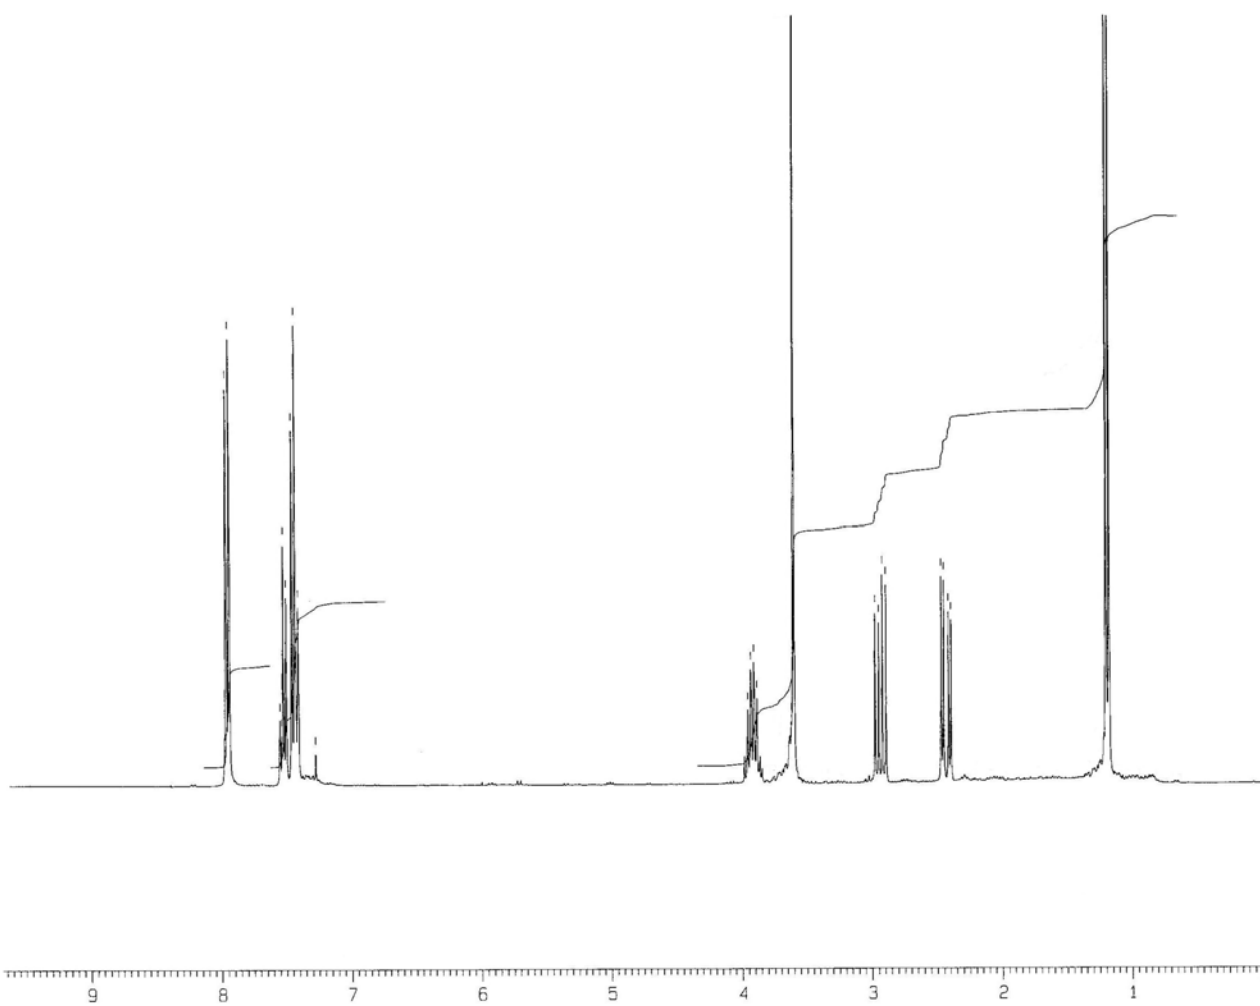



**Compound 6.**

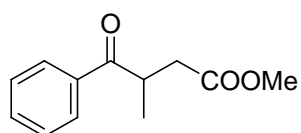

**<sup>13</sup>C-NMR**

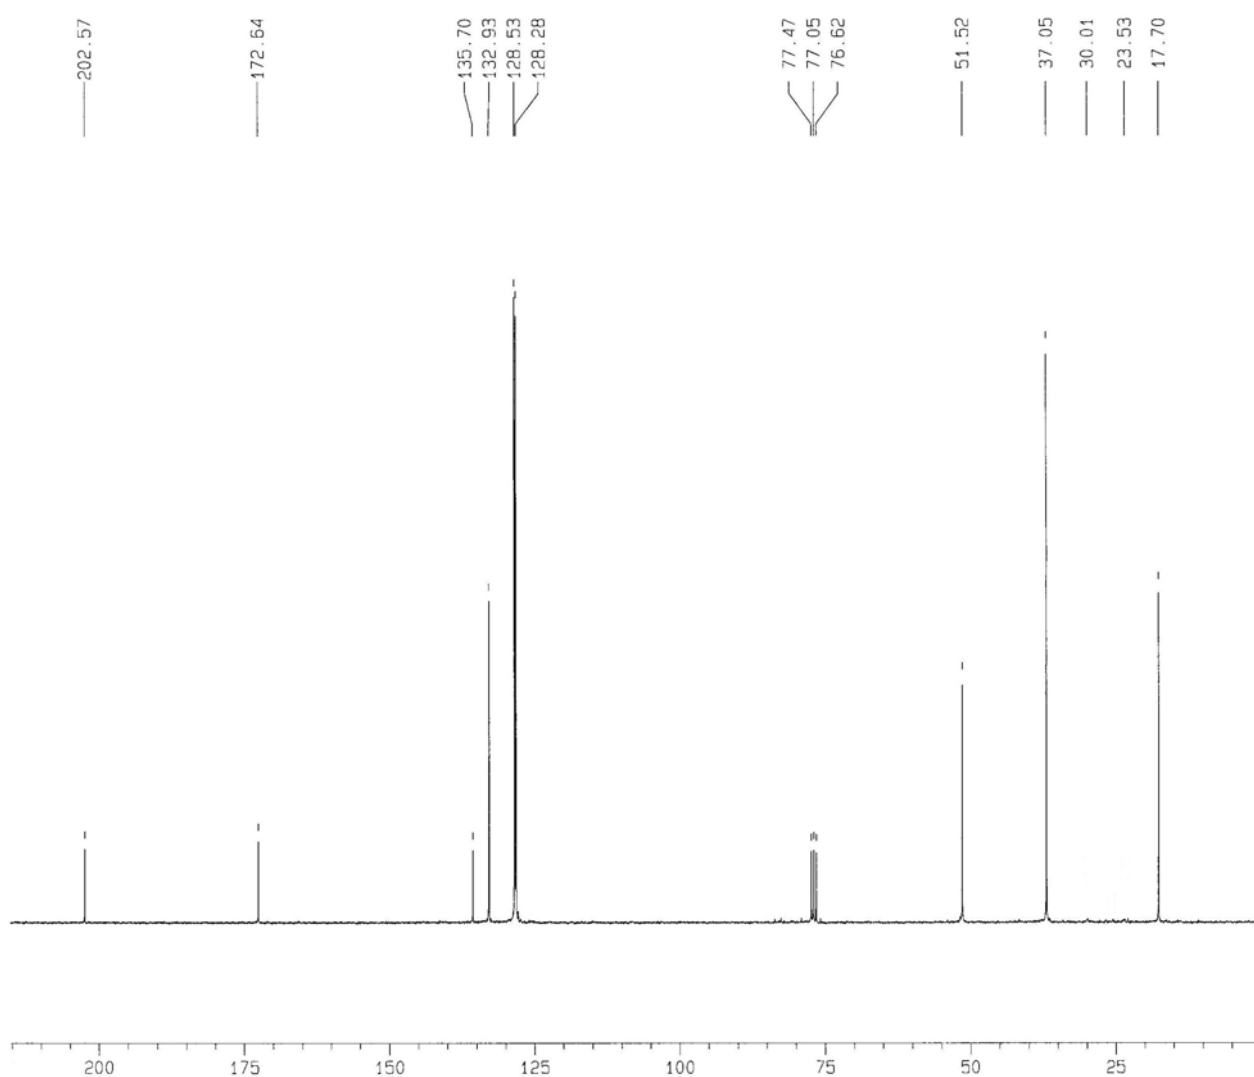

**Compound 7.**

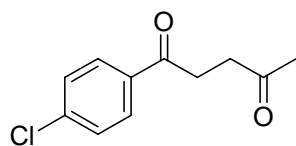

**<sup>1</sup>H-NMR**

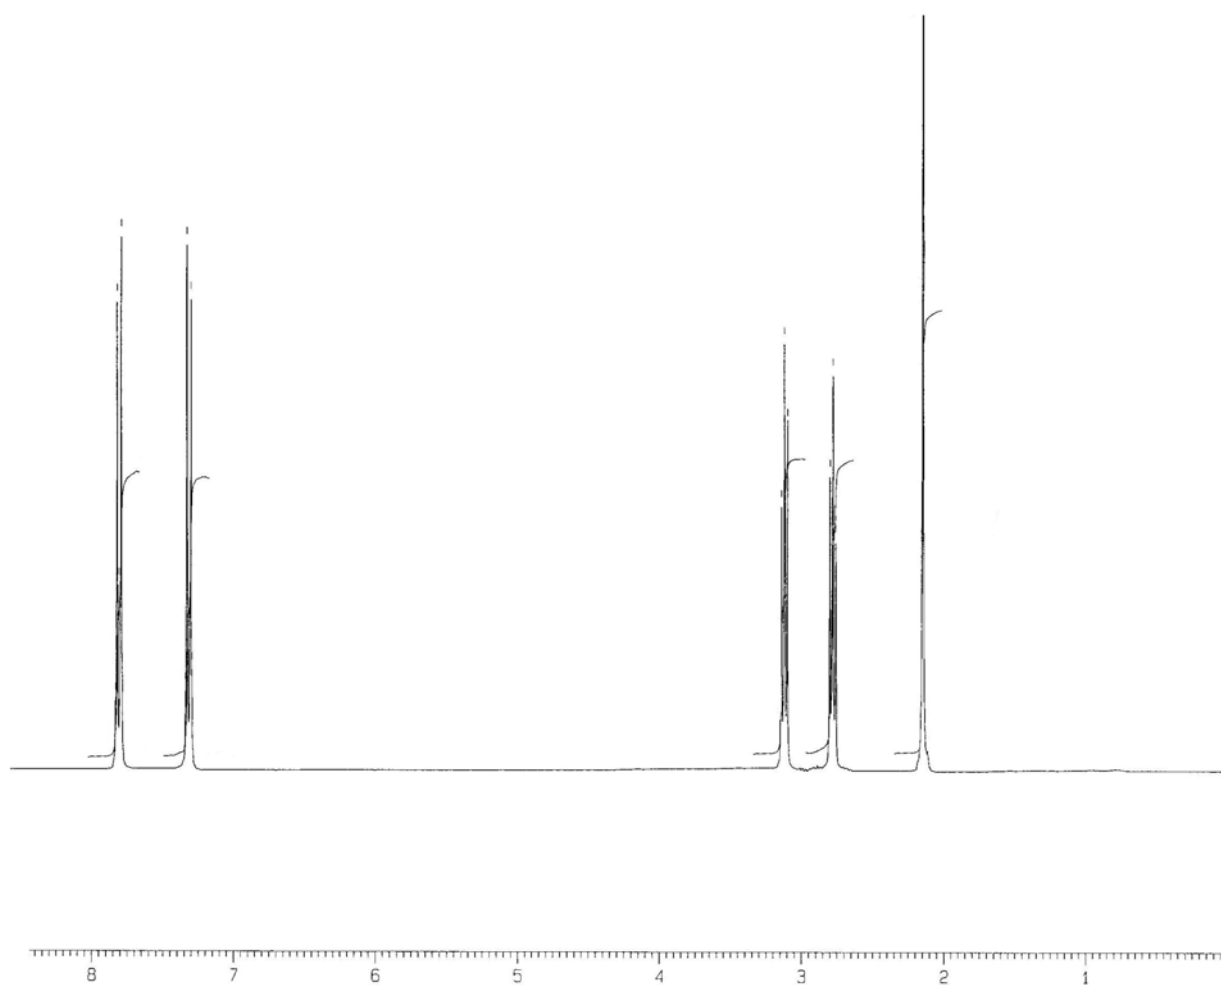

**Compound 7.**



**<sup>13</sup>C-NMR**

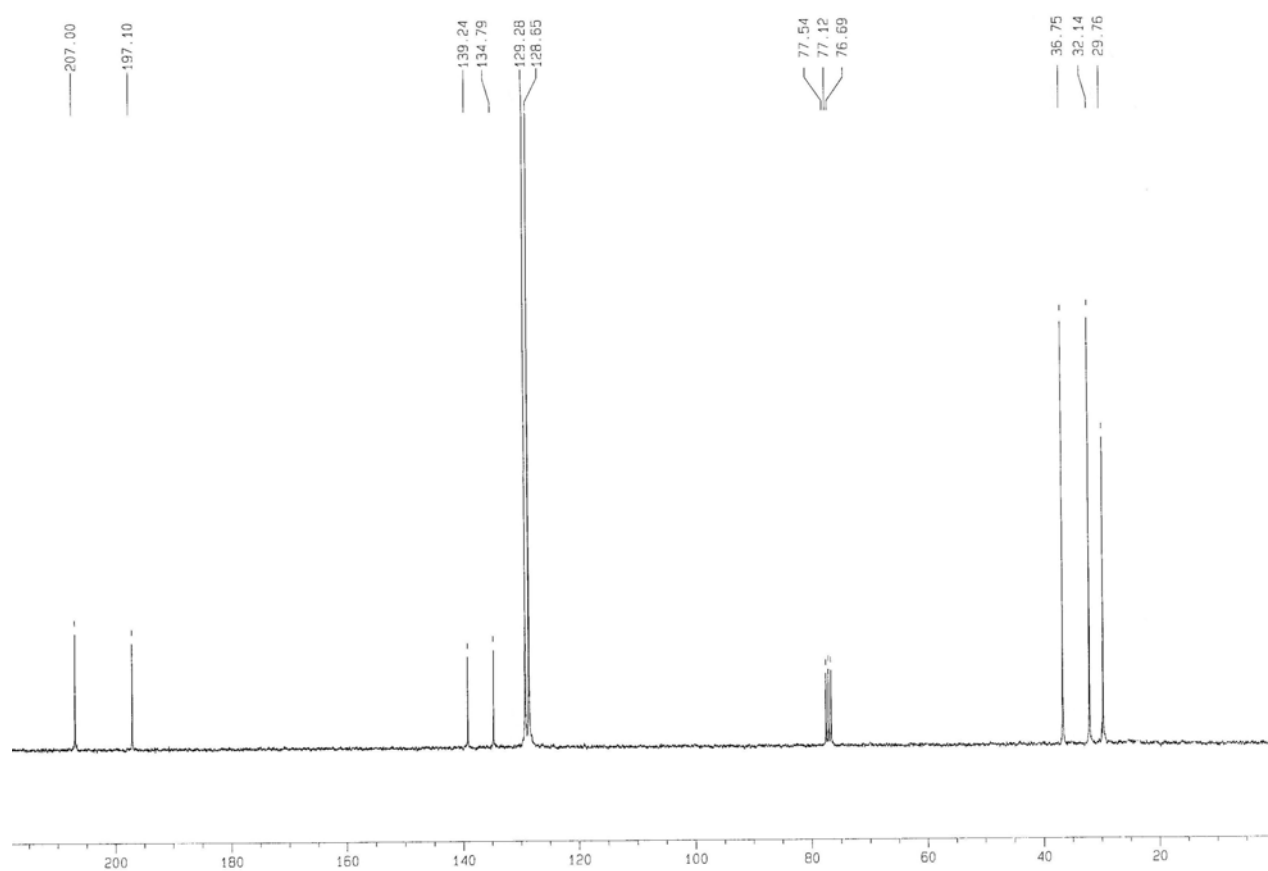

**Compound 8.**

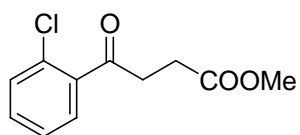

**<sup>1</sup>H-NMR**

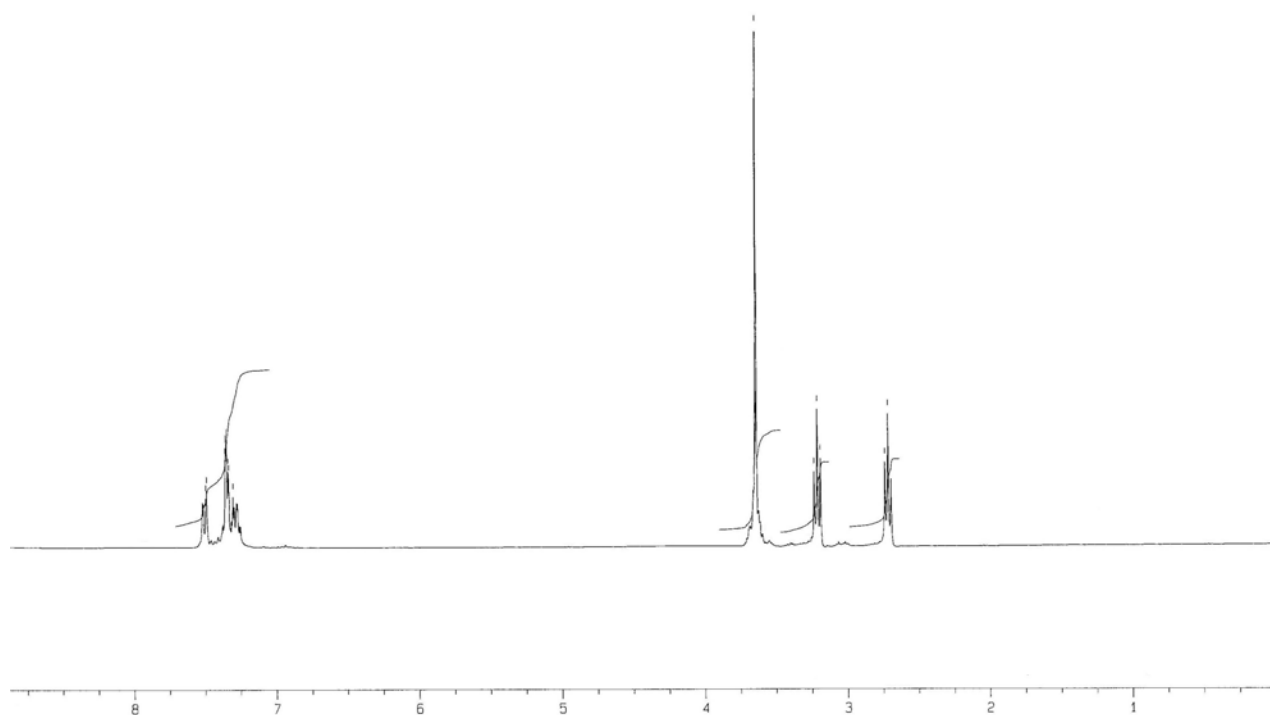

**Compound 8.**



**<sup>13</sup>C-NMR**

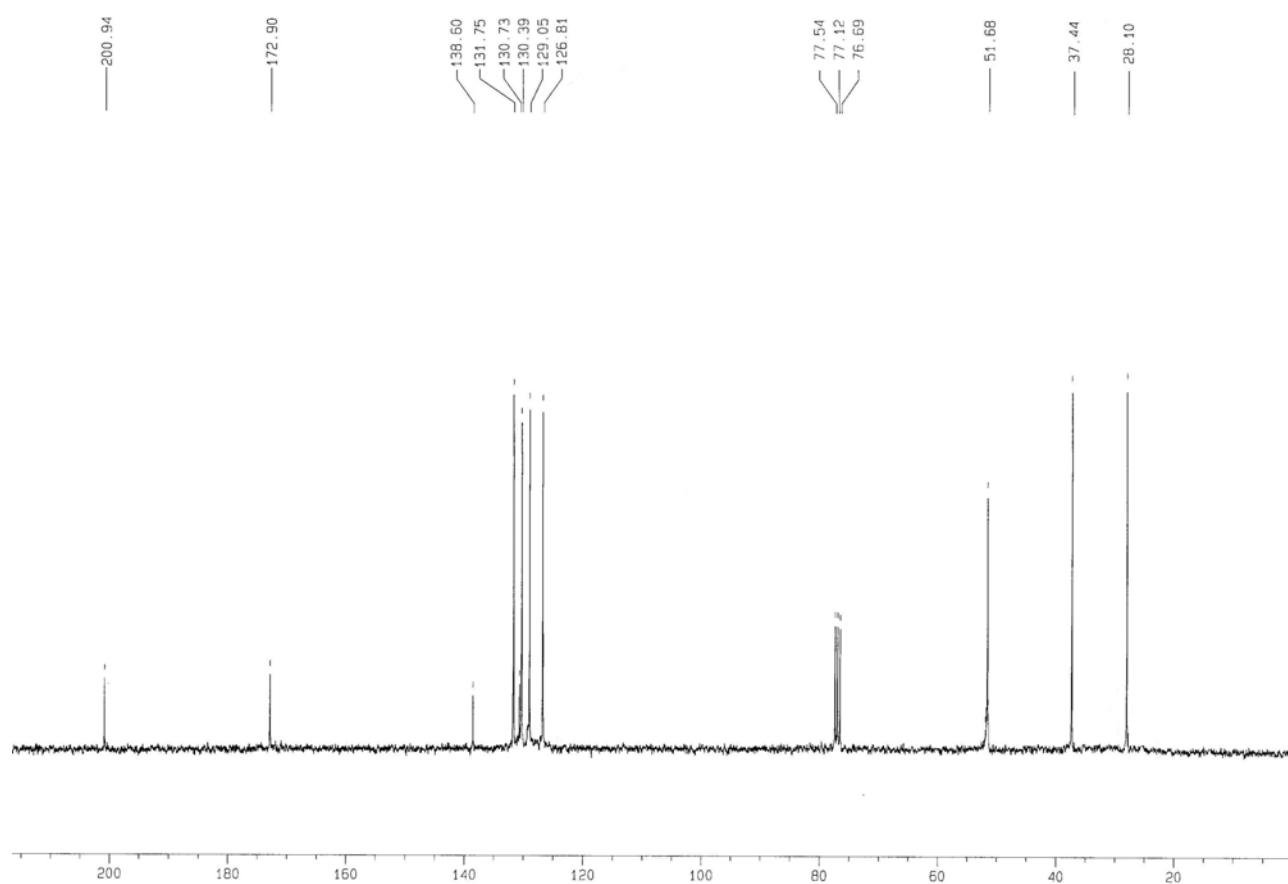

**Compound 9.**

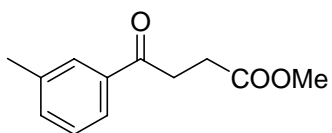

**<sup>1</sup>H-NMR**

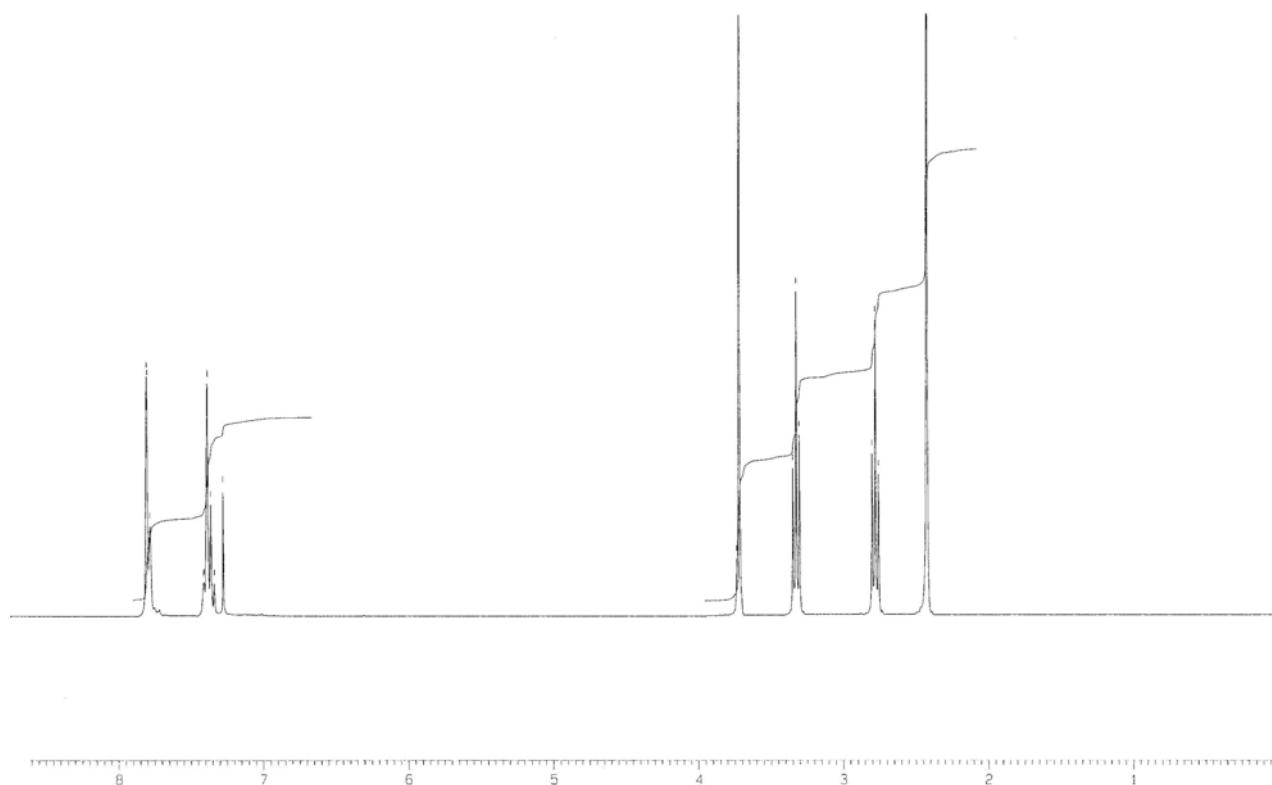

# Compound 9.

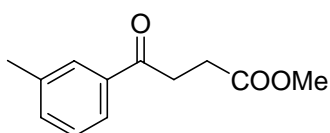

## <sup>13</sup>C-NMR

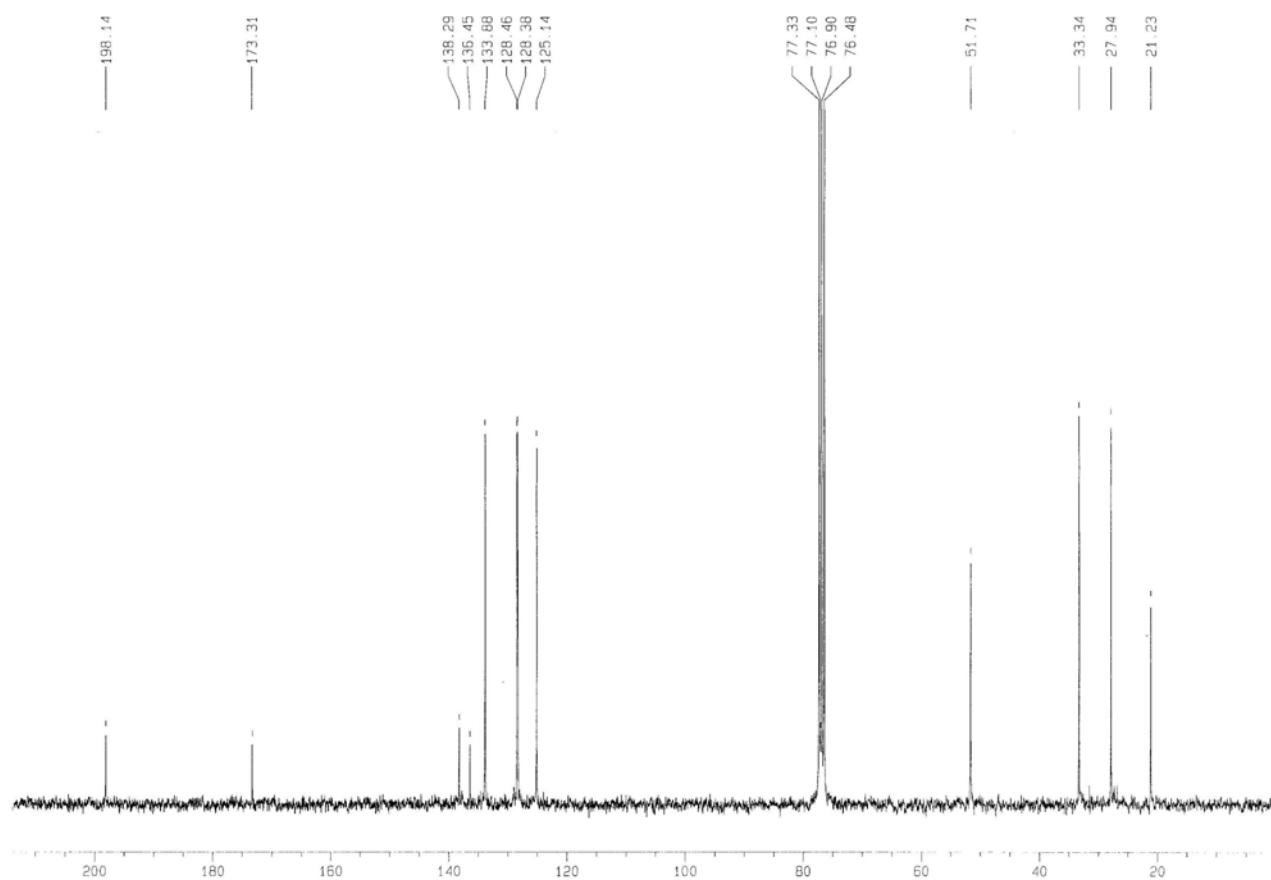

**Compound 11.**

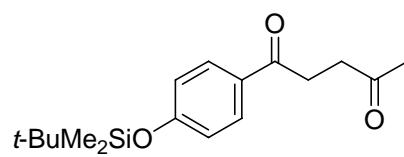

**<sup>1</sup>H-NMR**

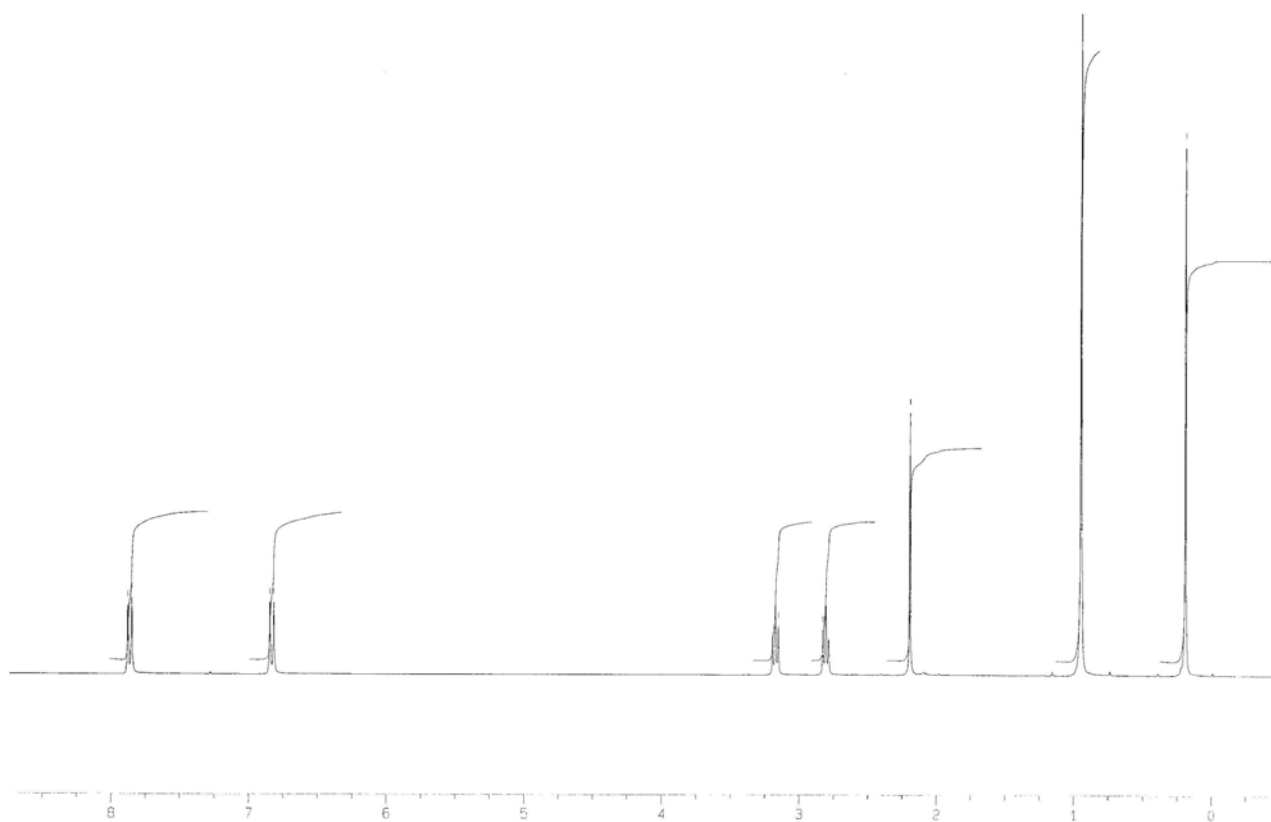



# Compound 11.



## <sup>13</sup>C-NMR

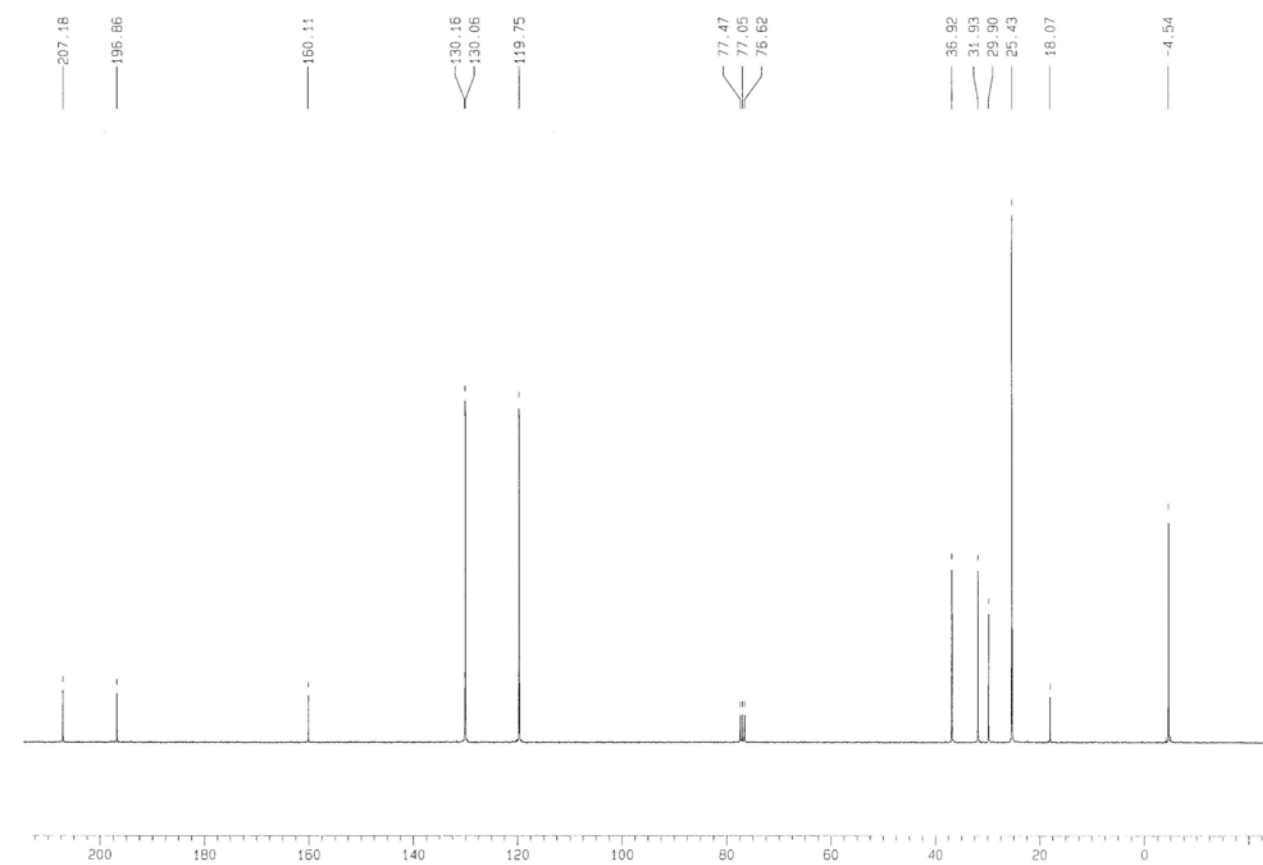

**Compound 12.**

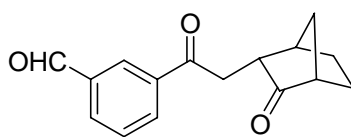

**<sup>1</sup>H-NMR**

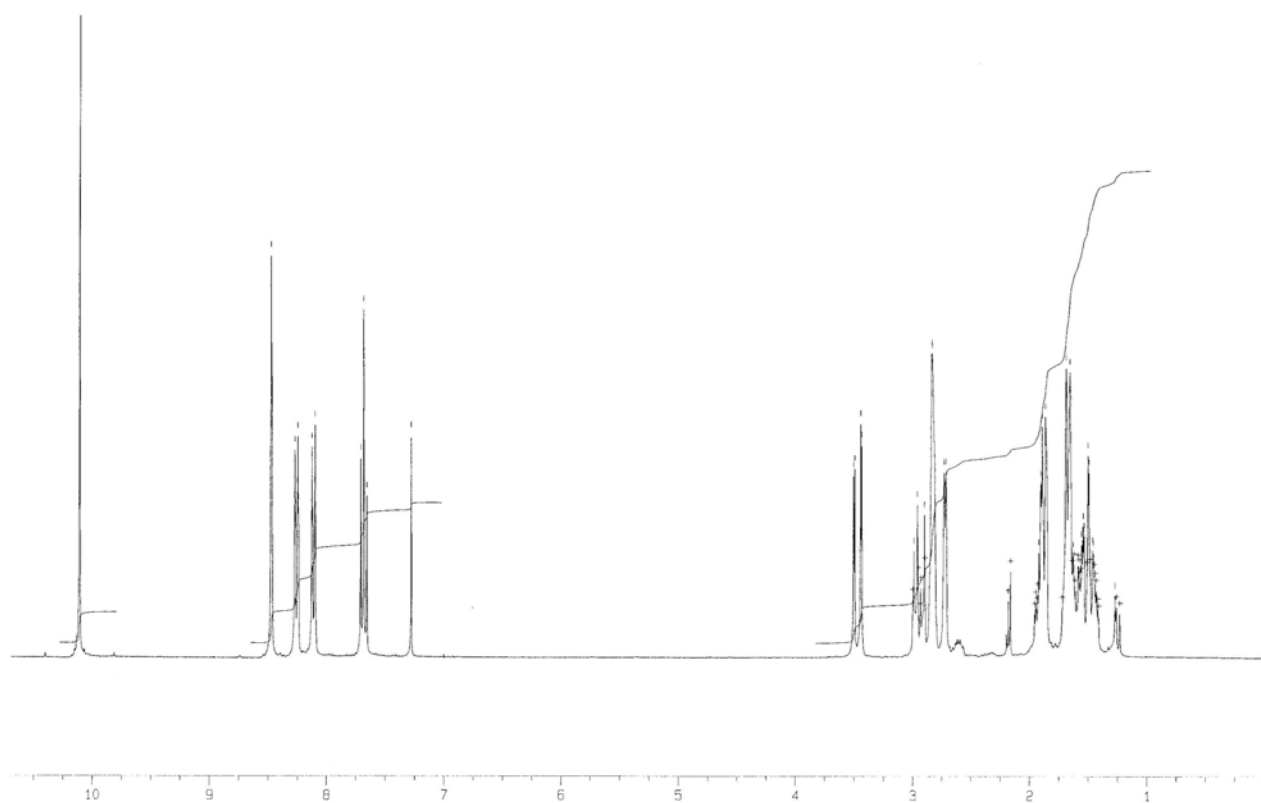

# Compound 12.



## <sup>13</sup>C-NMR

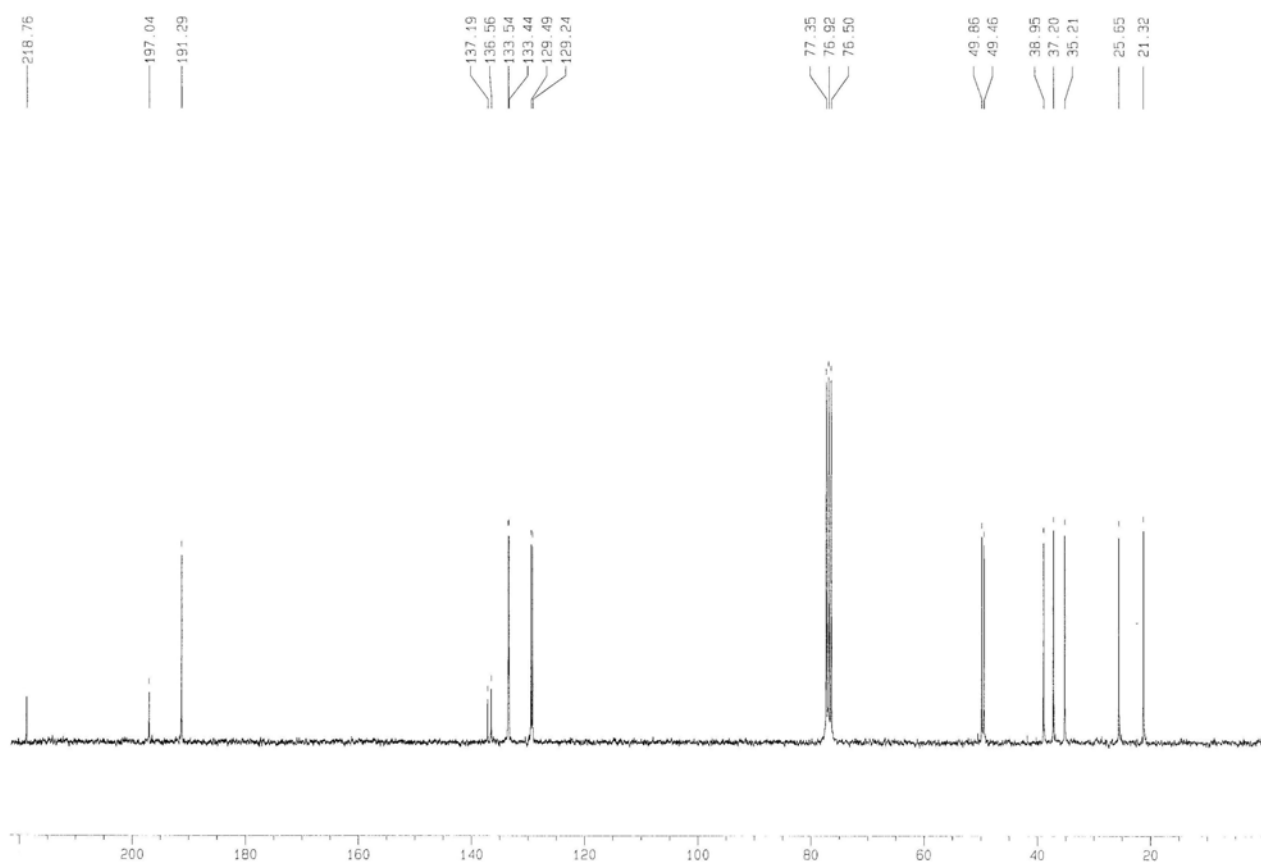

**Compound 13.**

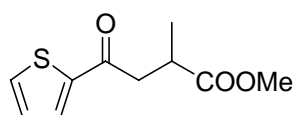

**<sup>1</sup>H-NMR**

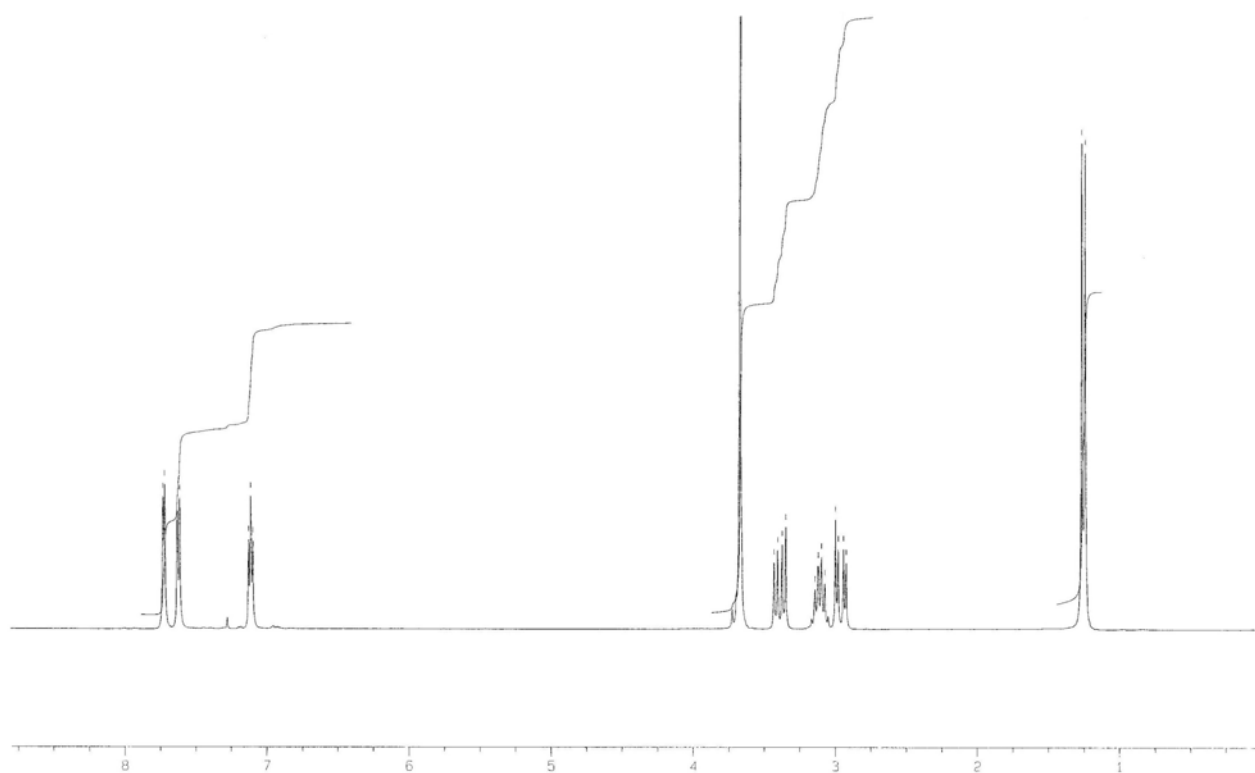

**Compound 13.**

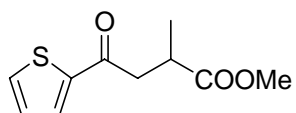

**<sup>13</sup>C-NMR**

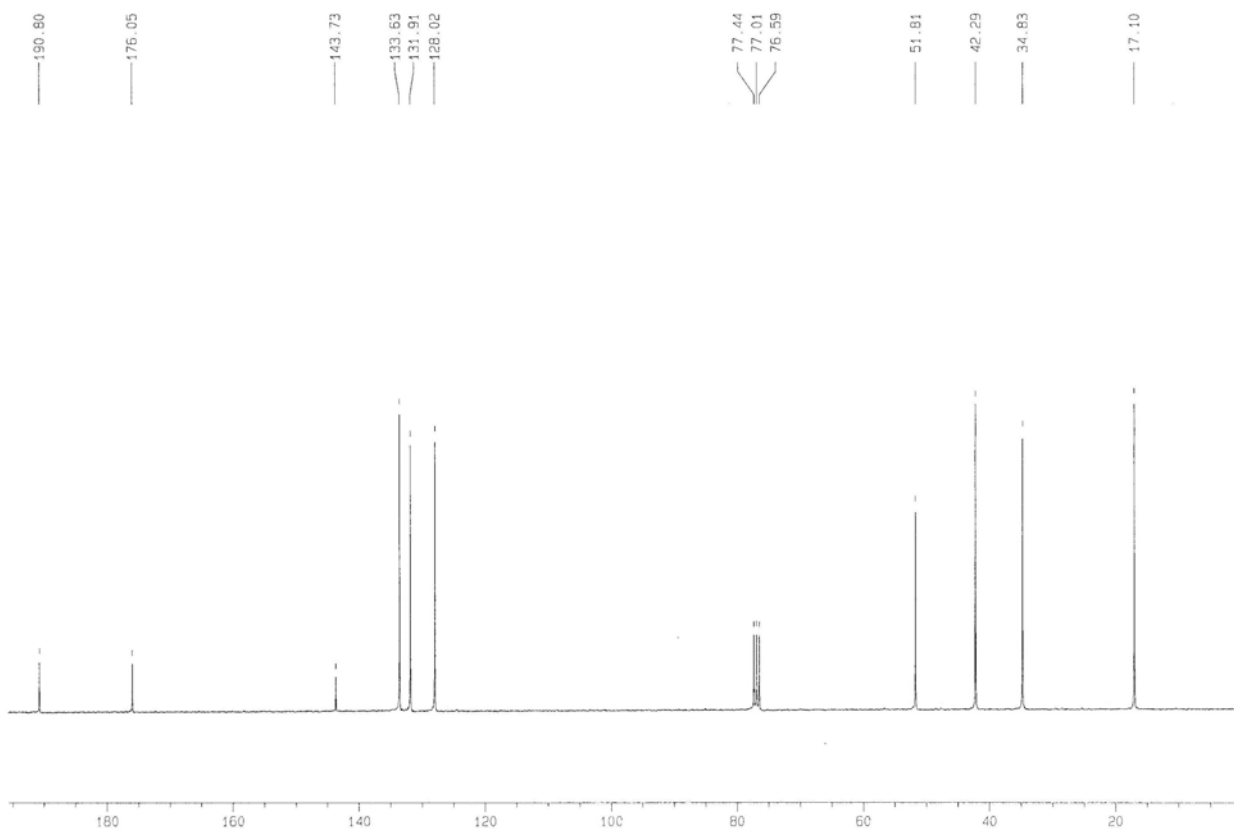

**Compound 14.**

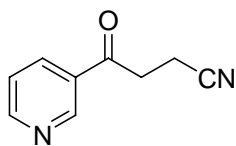

**<sup>1</sup>H-NMR**

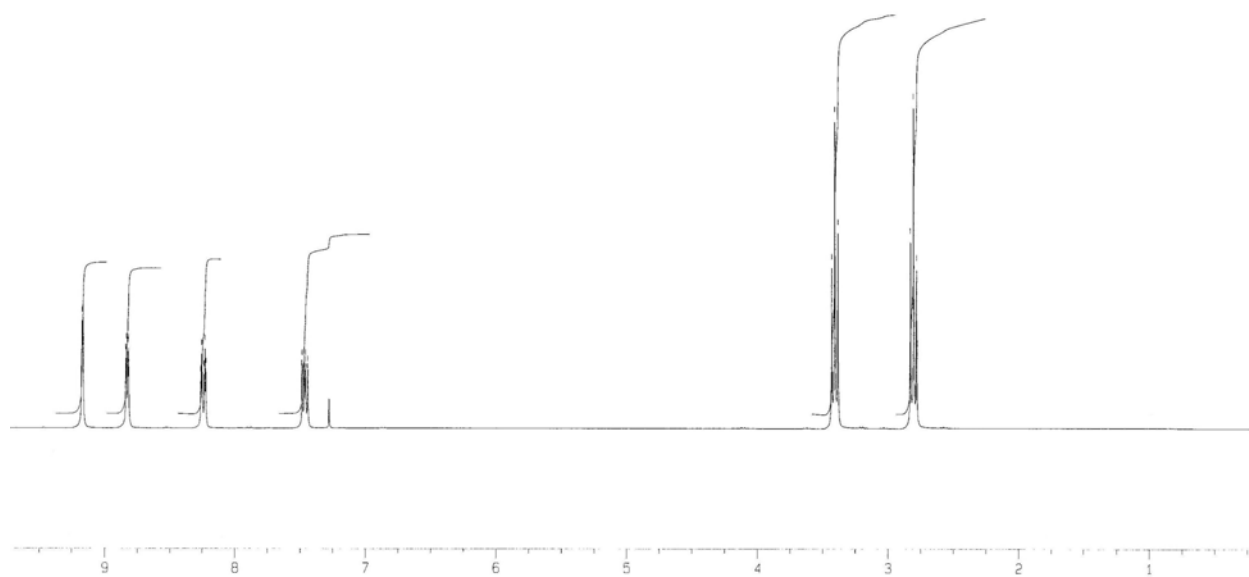

**Compound 14.**



**<sup>13</sup>C-NMR**

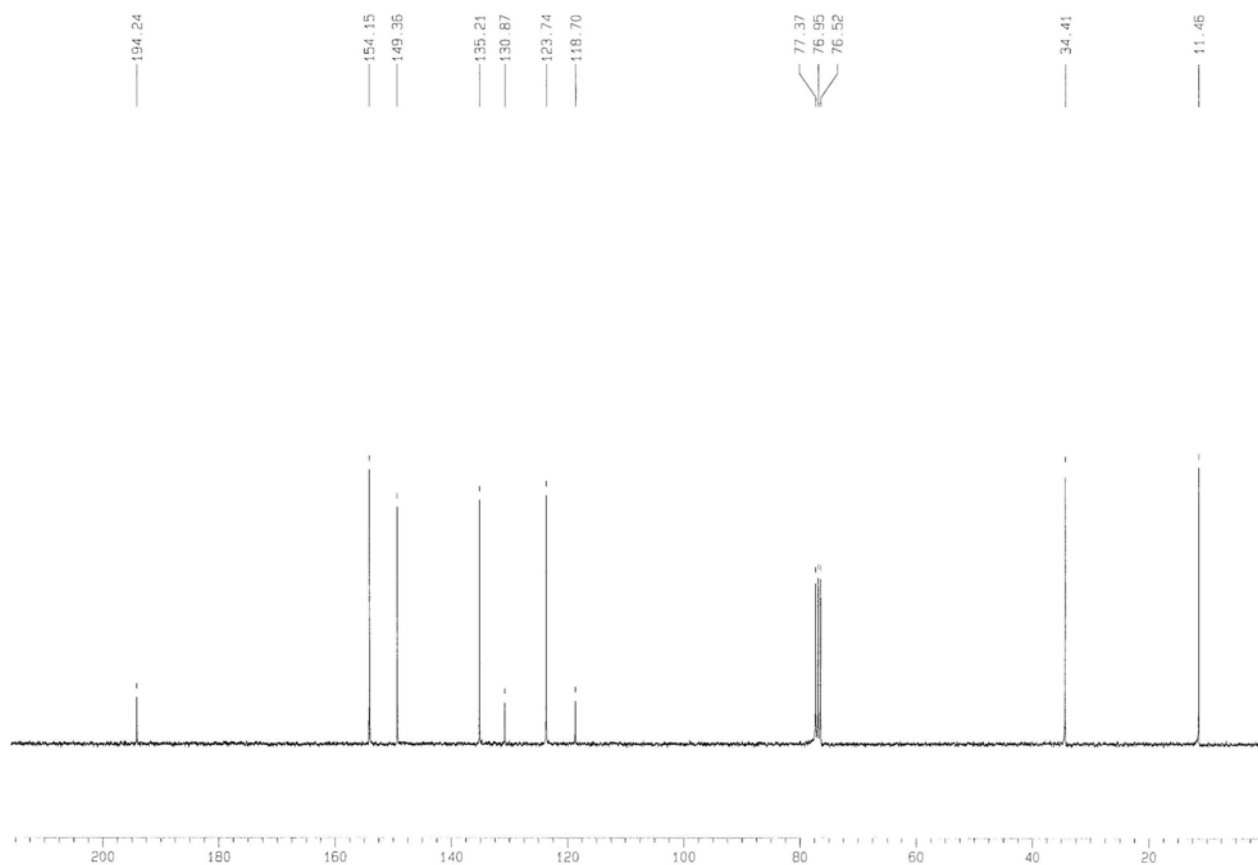

**Compound 15.**

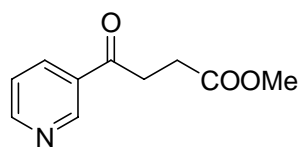

**<sup>1</sup>H-NMR**

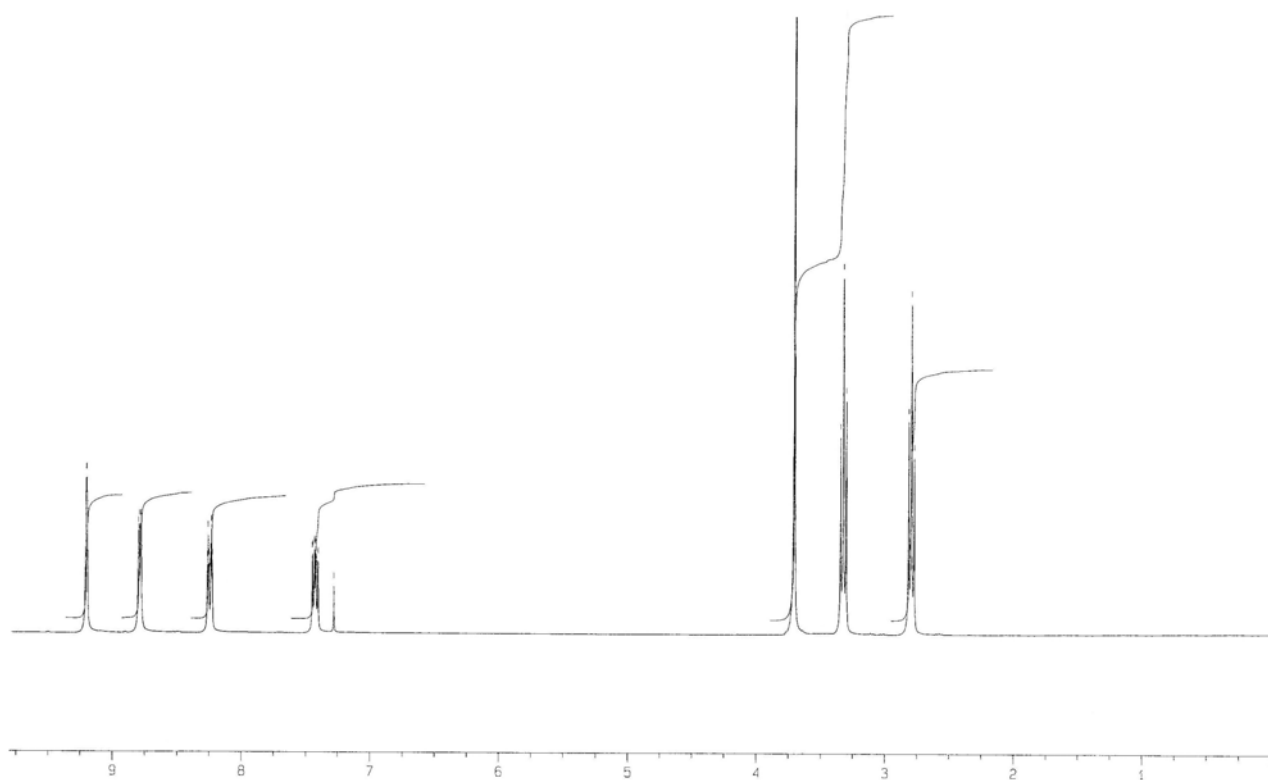



# Compound 15.

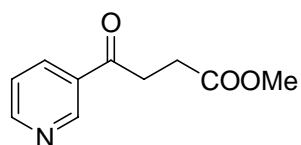

## <sup>13</sup>C-NMR

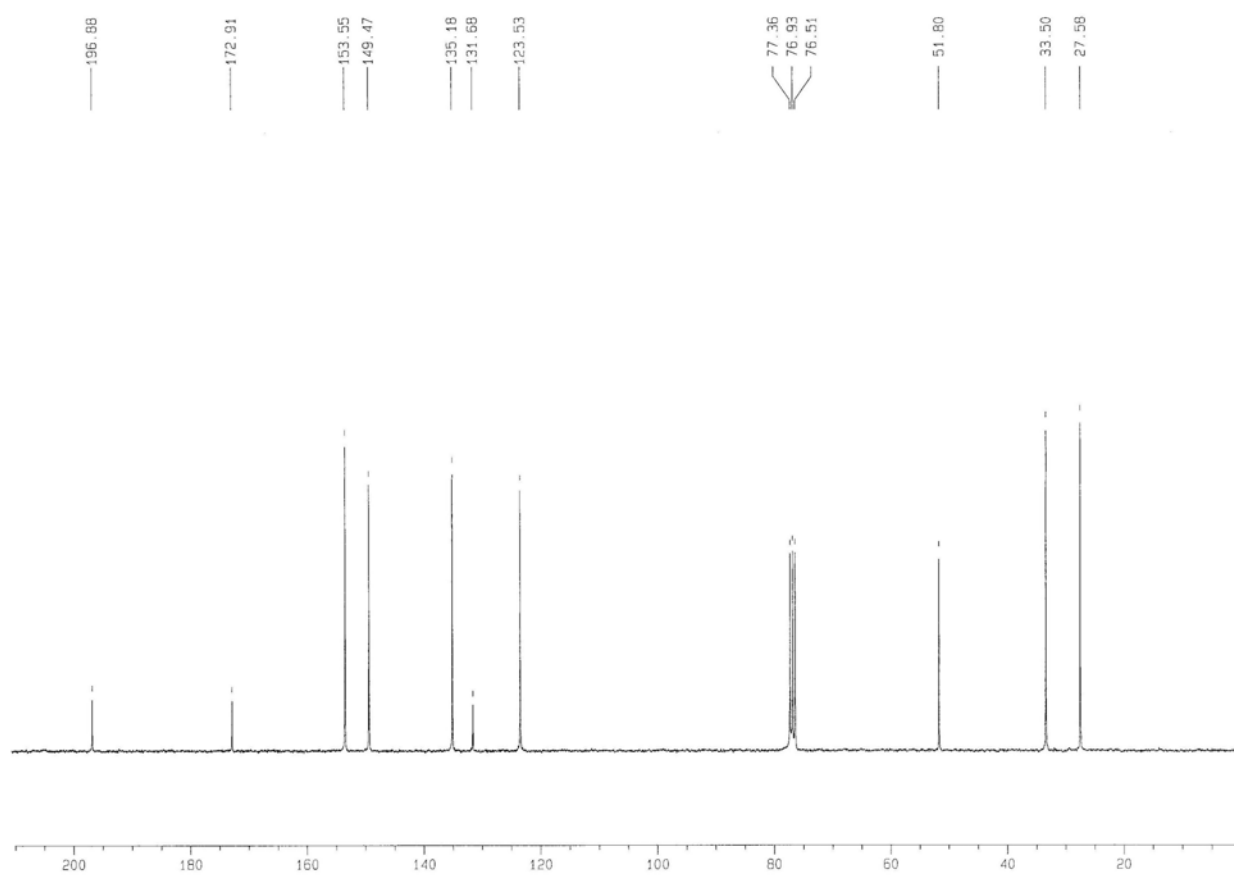

Supplement: c0ob00066c.pdf [file c0ob00066c.pdf]
